# Supplementary material for: Identification of Y-Box Binding Protein 1 As a Core Regulator of MEK/ERK Pathway-Dependent Gene Signatures in Colorectal Cancer Cells
Source: PLoS Genet. 2010 Dec 2;6(12):e1001231. doi: 10.1371/journal.pgen.1001231 (PMC2996331; doi:10.1371/journal.pgen.1001231)
Supplement: Table S2 — Statistical features of gene clustering were obtained by calculating the distance of each gene to the center of the cluster (parameter: in) and the distance to the center of the closest other cluster (parameter: out). The fit coefficient was computed using the formula: abs (out minus in)/(out plus in). (1.75 MB XLS) [file pgen.1001231.s007.xls]

## Sheet: Table1
Description	Cluster	In	Out	Fit (%)
209566_at	0	4915.2	569.108	79.2459
206636_at	0	3375.56	137.405	92.1772
208633_s_at	0	28.3996	0.3514	97.5558
212058_at	0	99.6363	7.4769	86.0392
201027_s_at	0	2283.61	4.155	99.6368
215027_at	0	6.0398	0.3514	89.0048
202301_s_at	0	8908.4	83.9009	98.1339
201048_x_at	0	24898.3	102.794	99.1777
201101_s_at	0	80176.3	3889.8	90.7459
213070_at	0	214.252	0.3514	99.6725
205281_s_at	0	71648.4	492.223	98.6354
221823_at	0	431.095	30.6346	86.7305
207983_s_at	0	12373.3	973.437	85.4131
209022_at	0	2869.65	2.9705	99.7932
209902_at	0	74346.8	192.261	99.4841
204258_at	0	19917.7	203.09	97.9813
215596_s_at	0	647707	3294.37	98.9879
209158_s_at	0	3052.17	22.1843	98.5568
214698_at	0	16773.9	48.2734	99.4261
218499_at	0	92176	41.384	99.9102
208634_s_at	0	44768.4	714.85	96.8566
201986_at	0	360867	1879.19	98.9639
206874_s_at	0	292614	1166.89	99.2056
212214_at	0	3229.35	2.3153	99.8567
212714_at	0	5011.62	0.3514	99.986
201237_at	0	32.4794	0.3514	97.8596
205372_at	0	13311.8	600.423	91.3684
212342_at	0	1.0561	0.3514	50.0706
213518_at	0	33904.4	552.416	96.7936
200855_at	0	68533.1	354.969	98.9694
201711_x_at	0	2.36126e+06	767.426	99.935
201197_at	0	8583.05	43.7564	98.9856
221691_x_at	0	9888.86	34.504	99.3046
200626_s_at	0	120.148	0.3514	99.4168
213012_at	0	58603.9	372.66	98.7362
201291_s_at	0	2723.73	15.6551	98.857
208896_at	0	142472	940.787	98.688
203491_s_at	0	107275	24.1554	99.955
213929_at	0	236779	1342.07	98.8728
204004_at	0	34411.5	2174.75	88.1116
218127_at	0	1193.4	0.3514	99.9411
218733_at	0	2239.47	18.2319	98.3849
209520_s_at	0	7717.38	153.443	96.101
221060_s_at	0	1671.04	31.6367	96.2839
201196_s_at	0	7741.39	68.2858	98.2513
202633_at	0	3975.18	1.2682	99.9362
207746_at	0	102.96	0.3514	99.3198
211851_x_at	0	75.7487	0.3514	99.0766
212060_at	0	28.9874	0.3864	97.3691
219787_s_at	0	293.658	0.3514	99.761
204772_s_at	0	31.6467	0.3514	97.8039
217043_s_at	0	39454.5	3246.15	84.7958
202696_at	0	15076.5	6784.55	37.9301
210530_s_at	0	67.6456	4.7289	86.9322
210947_s_at	0	694698	3074.23	99.1188
215708_s_at	0	16.7991	0.3514	95.9026
205632_s_at	0	2852	504.758	69.9258
212809_at	0	54.9633	0.5846	97.8953
211504_x_at	0	126989	34528.3	57.245
210214_s_at	0	4502.16	26.0494	98.8495
205219_s_at	0	472.21	7.0042	97.0768
205446_s_at	0	16503.5	2208.26	76.3971
210676_x_at	0	6289.23	956.935	73.5878
212619_at	0	78.8968	0.7998	97.9929
204742_s_at	0	10537	51.7482	99.0226
207724_s_at	0	4.1547	0.3514	84.4049
214257_s_at	0	7713.28	1860.81	61.1282
217778_at	0	6.2618	0.3514	89.374
200728_at	0	8589.33	3711.25	39.6573
202373_s_at	0	2541.9	449.025	69.9742
203048_s_at	0	109391	2045.61	96.3287
205026_at	0	3340.94	130.626	92.4745
206675_s_at	0	655.646	35.3406	89.771
207904_s_at	0	69.0569	1.7946	94.9343
208442_s_at	0	95.7629	2.0314	95.8455
209535_s_at	0	1008.49	179.154	69.8302
210858_x_at	0	283.768	9.911	93.2505
211665_s_at	0	886.58	62.3085	86.8671
212105_s_at	0	206.872	4.704	95.5534
214499_s_at	0	123.836	6.1297	90.5672
214544_s_at	0	6658.75	1786.82	57.6861
214683_s_at	0	76.8131	0.3514	99.0893
219383_at	0	807.012	234.61	54.953
207319_s_at	0	38.2782	5.7032	74.0652
221222_s_at	0	43.5685	7.4198	70.896
214671_s_at	0	307.674	44.0384	74.9577
201992_s_at	0	2371.91	740.977	52.3929
203970_s_at	0	8.302	1.9143	62.5248
204864_s_at	0	105.218	28.6643	57.1797
216711_s_at	0	389.646	66.4148	70.8746
212061_at	0	65.1278	13.3754	65.924
203526_s_at	0	42439.2	15235.3	47.168
205603_s_at	0	461.144	93.6821	66.2301
206544_x_at	0	57.7555	30.645	30.6678
214666_x_at	0	28.7755	4.9974	70.4061
213387_at	0	7.0552	1.9277	57.081
207712_at	0	8.4591	4.1484	34.1916
201656_at	0	19323.5	3122.7	72.1762
214720_x_at	0	11.8924	1.5371	77.1092
218244_at	0	45347	2542.96	89.38
213137_s_at	0	4694.36	683.883	74.5685
221088_s_at	0	62.8851	43.473	18.2516
203156_at	0	1.2829	1.247	1.4224
222122_s_at	0	0.4224	0.3938	3.5018
204843_s_at	0	263.744	173.342	20.6831
208866_at	0	84937.5	11077.8	76.925
221428_s_at	0	230.893	46.9165	66.224
203493_s_at	0	117354	7468.5	88.0334
203605_at	0	0.8249	0.3514	40.2579
204240_s_at	0	454.814	101.687	63.4549
207098_s_at	0	5672.87	1890.91	50.0009
200624_s_at	0	1.2172	0.3514	55.1995
209055_s_at	0	23620.5	14953.8	22.4677
212217_at	0	63.5584	31.9477	33.0981
220199_s_at	0	9846.03	1007.27	81.4384
200992_at	0	33920.7	13688.8	42.4956
201112_s_at	0	218.176	50.9931	62.1107
208897_s_at	0	1349.94	427.68	51.8817
209862_s_at	0	9627.5	5413.77	28.0144
218793_s_at	0	3055.72	1597.14	31.3481
201830_s_at	0	5933.77	2372.44	42.8755
201241_at	0	5.4089	2.1858	42.4389
203341_at	0	53305	38332.7	16.3386
218412_s_at	1	0.4296	0.3514	10.0238
212464_s_at	1	85.6609	63.2552	15.0459
213531_s_at	1	2387.14	0.5614	99.953
208864_s_at	1	91.9854	0.3514	99.239
212219_at	1	52.2118	0.4448	98.3104
209653_at	1	18698.8	0.3514	99.9962
200995_at	1	42818.7	723.871	96.6751
203105_s_at	1	1263.53	3.2086	99.4934
208772_at	1	434.517	0.4657	99.7859
209272_at	1	6675.6	19.861	99.4067
210907_s_at	1	666.493	4.1834	98.7525
213872_at	1	12.1702	0.3514	94.3879
217465_at	1	114.35	0.3514	99.3873
201984_s_at	1	1758.01	0.3514	99.96
212197_x_at	1	11.1374	0.3514	93.8834
212267_at	1	60.3396	5.3477	83.7177
212642_s_at	1	1546.6	0.3514	99.9546
201574_at	1	39.7406	0.3514	98.2472
202082_s_at	1	64.2862	0.3514	98.9128
213342_at	1	93.7471	0.3514	99.2532
217987_at	1	70.7029	0.3514	99.011
204101_at	1	15.2251	0.3514	95.4886
204216_s_at	1	48.7117	0.3514	98.5677
209248_at	1	89.6059	0.3514	99.2188
210028_s_at	1	21.137	0.3514	96.7298
211414_at	1	7.7002	0.3514	91.2722
209165_at	1	12.7346	0.3514	94.63
210716_s_at	1	994.025	64.7554	87.7679
221510_s_at	1	511.802	0.5599	99.7815
211707_s_at	1	14527.8	71.6879	99.0179
214629_x_at	1	11.6481	0.3514	94.1437
218050_at	1	11242.6	0.4789	99.9915
201595_s_at	1	81.18	0.3514	99.1381
218669_at	1	148.954	0.3514	99.5293
209122_at	1	14.5995	0.3514	95.2998
204005_s_at	1	88.1226	0.3514	99.2057
200776_s_at	1	1.5532	0.3514	63.1035
201138_s_at	1	21.485	4.7411	63.8446
201207_at	1	17.5111	0.3514	96.0659
201238_s_at	1	22.5592	0.3514	96.9328
201411_s_at	1	62.1306	0.3514	98.8753
201559_s_at	1	60.1395	17.7042	54.5134
201560_at	1	929.501	1.0779	99.7683
201960_s_at	1	1353.01	127.638	82.7592
202129_s_at	1	11.4813	0.3514	94.0612
202130_at	1	2.6275	0.3514	76.4095
202131_s_at	1	6.5755	0.3514	89.8552
202720_at	1	960.922	0.3514	99.9269
202760_s_at	1	4.958	0.3514	86.7644
202874_s_at	1	9.7531	0.3514	93.0455
203158_s_at	1	22.9298	0.3514	96.9816
203253_s_at	1	7.7756	0.3514	91.3532
203320_at	1	19.2893	0.3514	96.4221
203497_at	1	9924.91	0.896	99.9819
204435_at	1	407.019	0.3514	99.8275
204521_at	1	18.3118	0.4014	95.7096
205302_at	1	4.937	0.3514	86.712
205790_at	1	164.304	6.3913	92.5115
205995_x_at	1	464.801	2.7418	98.8271
207517_at	1	1.0395	0.5553	30.3606
208047_s_at	1	0.7778	0.3514	37.7684
208908_s_at	1	183.052	0.3514	99.6168
209225_x_at	1	27754.3	3.5747	99.9742
209744_x_at	1	6552.48	0.3514	99.9893
209903_s_at	1	540.102	151.049	56.2905
211343_s_at	1	1.8248	0.3514	67.7083
212307_s_at	1	3297.42	0.3514	99.9787
212470_at	1	1.3675	0.3514	59.1161
213082_s_at	1	2.8292	0.3514	77.9056
216996_s_at	1	0.4747	0.3514	14.9271
217825_s_at	1	1.7745	0.3514	66.9436
218728_s_at	1	85.6523	0.3514	99.1829
218804_at	1	0.776	0.3514	37.6688
219474_at	1	6.6248	0.3514	89.9268
220547_s_at	1	0.7564	0.3514	36.5637
220610_s_at	1	14.7604	0.3514	95.3498
220742_s_at	1	2.0276	0.3514	70.4616
221829_s_at	1	9066.81	250.304	94.627
202033_s_at	1	2.5101	0.712	55.8038
202147_s_at	1	2887.83	45.6848	96.8853
203429_s_at	1	10.2043	2.318	62.9777
205068_s_at	1	9.3079	0.3514	92.7249
209023_s_at	1	695.393	255.416	46.2739
209369_at	1	0.6819	0.3514	31.9882
209991_x_at	1	0.7068	0.3514	33.5929
213940_s_at	1	169.786	4.9074	94.3817
217738_at	1	24.4921	7.1933	54.5956
217941_s_at	1	1.7518	0.3514	66.5872
219002_at	1	0.5967	0.3514	25.8745
219595_at	1	4.7806	0.3514	86.3069
221472_at	1	13.4569	0.3514	94.9109
203556_at	1	14.0001	0.3514	95.1035
205248_at	1	1.977	0.3514	69.8185
208876_s_at	1	29.2587	2.635	83.4766
213136_at	1	0.384	0.3514	4.4401
219199_at	1	0.5848	0.3514	24.932
34187_at	1	63.5307	7.7072	78.3621
207467_x_at	1	22.9382	1.2288	89.8311
218224_at	1	817.342	0.3514	99.9141
202451_at	1	6.7174	0.3514	90.0588
212612_at	1	1.5424	0.3514	62.8933
203630_s_at	1	5589.19	10.1943	99.6359
218684_at	1	11.4192	0.3514	94.0298
217967_s_at	1	1.0192	0.3514	48.7269
200629_at	1	2.0202	0.3514	70.3684
217966_s_at	1	0.515	0.3514	18.8906
204194_at	1	0.9874	0.3514	47.5091
218853_s_at	1	427.38	304.074	16.8577
221652_s_at	1	7.3311	5.3428	15.6881
203629_s_at	1	110.998	75.193	19.2303
205361_s_at	1	1166.7	253.438	64.3081
214696_at	1	82.3699	13.0594	72.6303
213229_at	1	209.609	7.4931	93.0972
208878_s_at	1	2118.18	13.7557	98.7096
211719_x_at	1	2393.73	34.4696	97.1609
217094_s_at	1	55172.2	2.6901	99.9902
202056_at	1	3600.44	46.4243	97.454
202333_s_at	1	2387.81	357.433	73.9598
221896_s_at	1	119.762	9.0065	86.0113
200977_s_at	1	16.0711	0.3514	95.721
207563_s_at	1	95.3919	1.3209	97.2685
212010_s_at	1	702.91	1.8068	99.4872
213696_s_at	1	1534.22	85.9185	89.3937
212474_at	1	8124.45	12.9703	99.6812
219221_at	1	458.67	194.385	40.4691
201888_s_at	1	276.322	52.765	67.9324
204369_at	1	3908.13	510.534	76.8919
204790_at	1	3.9891	0.3514	83.8099
210495_x_at	1	933.517	6.8561	98.5418
210635_s_at	1	496.582	17.8968	93.0427
214718_at	1	1670.72	18.8368	97.7702
218263_s_at	1	712.923	109.276	73.4187
206061_s_at	1	134.271	2.0596	96.9785
215567_at	1	0.7929	0.3514	38.5883
216442_x_at	1	1859.57	32.2144	96.5943
209485_s_at	1	529.466	29.4255	89.47
212222_at	1	177.15	2.4329	97.2905
218572_at	1	1258.58	123.15	82.1745
212467_at	1	18.2739	8.2659	37.7092
218343_s_at	1	1447.88	88.4099	88.4905
219496_at	1	28100.4	8.2907	99.941
202011_at	1	20185.9	517.437	95.0014
204190_at	1	6991.72	324.188	91.1374
218254_s_at	1	211.037	27.8493	76.684
200976_s_at	1	157.198	22.1528	75.2967
201019_s_at	1	12.7993	0.3514	94.6564
201229_s_at	1	10121	281.371	94.5903
201259_s_at	1	6123	504.858	84.7656
202100_at	1	144.531	59.1416	41.925
202124_s_at	1	274.017	3.0652	97.7875
203087_s_at	1	2.3776	0.3859	72.0693
203200_s_at	1	1728.66	4.9918	99.4241
203305_at	1	10.5071	0.3514	93.5284
203374_s_at	1	3.5765	0.3514	82.1092
203702_s_at	1	10.3107	0.3514	93.4092
203971_at	1	2715.38	182.949	87.3756
204182_s_at	1	13.9354	2.9934	64.6353
205531_s_at	1	267.542	0.3923	99.7072
206860_s_at	1	14.2281	4.315	53.4594
208290_s_at	1	20.9423	9.0071	39.851
208310_s_at	1	291.708	2.2637	98.4599
208540_x_at	1	11019.7	27.6817	99.4989
208875_s_at	1	5211.56	35.3106	98.654
208943_s_at	1	1.1838	0.3514	54.2262
209020_at	1	13238.4	522.064	92.4121
209249_s_at	1	3333.95	325.551	82.2079
209909_s_at	1	0.77	0.3514	37.3345
210105_s_at	1	4187.89	1021.65	60.7777
211763_s_at	1	157.126	2.4809	96.8912
212086_x_at	1	10498.4	578.243	89.5593
212379_at	1	394.238	0.3514	99.8219
213124_at	1	364.111	2.0789	98.8646
214096_s_at	1	238.48	33.1661	75.5814
214437_s_at	1	12.8334	2.5319	67.0444
216033_s_at	1	3330.95	425.155	77.362
216574_s_at	1	61.5622	5.3994	83.8732
218193_s_at	1	4379.35	60.8175	97.2606
219031_s_at	1	262.687	23.3264	83.6886
219118_at	1	1276.02	13.7689	97.8649
219983_at	1	61.1668	9.5646	72.955
221931_s_at	1	1306.15	95.1719	86.4168
201177_s_at	1	426.739	63.5458	74.078
202185_at	1	273.673	155.519	27.5292
204255_s_at	1	3.7763	0.3514	82.9752
205704_s_at	1	1.4888	0.3514	61.8111
209822_s_at	1	496.646	173.39	48.2445
210968_s_at	1	2.6725	0.3514	76.7608
213793_s_at	1	29.1921	3.1349	80.6051
214095_at	1	0.7843	0.3514	38.122
219821_s_at	1	231.349	50.1287	64.3818
214435_x_at	1	0.9028	0.3514	43.9679
220162_s_at	1	44.0233	8.8879	66.4044
214431_at	1	145.46	52.7542	46.7705
218360_at	1	799.605	463.699	26.5895
209086_x_at	1	8.2669	2.5608	52.6994
205315_s_at	1	0.9757	0.3514	47.0456
217898_at	1	0.6885	0.3514	32.4219
207657_x_at	1	68.5309	22.5202	50.5328
201629_s_at	1	12.844	4.2802	50.0103
211992_at	1	1408.21	771.371	29.2183
212810_s_at	1	846.831	432.82	32.3534
213370_s_at	1	10.4677	5.6693	29.7355
205854_at	1	267.786	174.883	20.987
209012_at	1	36.4796	21.9691	24.826
202358_s_at	1	156.759	105.097	19.7291
218321_x_at	1	494.992	381.892	12.898
205874_at	1	7.0306	3.613	32.1093
203345_s_at	2	73.0416	41.1641	27.9124
208686_s_at	2	9.4184	3.9839	40.5494
220097_s_at	2	0.4279	0.3514	9.8196
207508_at	2	134391	66.736	99.9007
212405_s_at	2	2.7491	0.3514	77.3351
213897_s_at	2	163.773	0.3514	99.5718
200877_at	2	417.864	0.3514	99.832
218187_s_at	2	44.5627	0.8419	96.2918
211997_x_at	2	1123.26	0.573	99.898
221759_at	2	2001.51	15.4949	98.4636
205356_at	2	54.6838	1.4287	94.9079
208415_x_at	2	40.3743	0.6535	96.8141
212167_s_at	2	22.0964	3.1667	74.9304
213175_s_at	2	115.925	0.3514	99.3956
201184_s_at	2	99.4139	0.3514	99.2956
206052_s_at	2	10187.8	283.961	94.5767
207265_s_at	2	114.6	0.3514	99.3887
209478_at	2	20692.9	430.667	95.9224
210418_s_at	2	74854.8	29.6298	99.9209
211270_x_at	2	63088.7	13.2366	99.958
213061_s_at	2	628.747	18.7392	94.2117
214882_s_at	2	31093.1	1.0305	99.9934
202589_at	2	39614.5	0.3514	99.9982
215905_s_at	2	100281	0.4599	99.9991
201173_x_at	2	87024.9	919.763	97.9083
209484_s_at	2	133.028	1.5191	97.7418
211730_s_at	2	4774.67	72.6006	97.0045
213720_s_at	2	363.744	2.0993	98.8523
200754_x_at	2	36.675	0.3514	98.1021
209330_s_at	2	37214.6	0.5921	99.9968
210358_x_at	2	353.797	100.868	55.6299
216396_s_at	2	6851.26	28.2987	99.1773
203444_s_at	2	92.114	0.8242	98.2262
201697_s_at	2	377063	2096.5	98.8941
203806_s_at	2	3.9377	0.3514	83.6162
204752_x_at	2	126440	771.672	98.7868
221791_s_at	2	347.265	0.3514	99.7978
200604_s_at	2	1101.41	37.6405	93.3909
211168_s_at	2	35295.9	5233.83	74.1729
200773_x_at	2	77.9303	0.3514	99.1023
216237_s_at	2	207374	1.0252	99.999
202496_at	2	3.496	1.5966	37.2972
209832_s_at	2	2019.07	5.9718	99.4102
203976_s_at	2	750.916	0.9382	99.7504
218438_s_at	2	159.966	2.0164	97.5104
202189_x_at	2	110920	9.9006	99.9821
207984_s_at	2	9.2592	0.3514	92.688
202094_at	2	215.027	0.3514	99.6737
217854_s_at	2	12435.9	114.133	98.1812
217957_at	2	212.43	89.0175	40.94
200040_at	2	1464.53	112.531	85.7291
209069_s_at	2	3325.06	0.3982	99.9761
212015_x_at	2	14700.6	2.9007	99.9605
217118_s_at	2	8161.37	39.2327	99.0432
203302_at	2	3448.26	61.5057	96.4952
218308_at	2	5427.25	0.3514	99.9871
218410_s_at	2	27.7386	0.3514	97.4983
201498_at	2	174443	15.3981	99.9823
209811_at	2	109.478	0.818	98.5166
212142_at	2	59676.4	26.8825	99.9099
217804_s_at	2	9.6561	0.3514	92.978
200072_s_at	2	21319.1	0.3514	99.9967
210543_s_at	2	249.371	1.7812	98.5816
210820_x_at	2	565.524	13.0594	95.4857
211271_x_at	2	8555.64	16.6042	99.6126
200880_at	2	1.2237	0.3514	55.3836
202095_s_at	2	1698.87	0.3514	99.9586
204617_s_at	2	1998.67	0.3514	99.9648
213098_at	2	958.941	7.5104	98.4458
203022_at	2	115013	23.0748	99.9599
205061_s_at	2	71356.2	6.1777	99.9827
201755_at	2	12566.4	0.3514	99.9944
210574_s_at	2	303152	0.6941	99.9995
221548_s_at	2	18960.5	87.4285	99.082
212973_at	2	53.943	0.3514	98.7057
213989_x_at	2	410.533	0.8411	99.5911
216952_s_at	2	14864	4.8887	99.9342
221940_at	2	7584.49	112.976	97.0646
206504_at	2	228.573	2.049	98.2231
211812_s_at	2	6047.66	260.834	91.7307
208931_s_at	2	23802	14.6728	99.8768
210014_x_at	2	74705.6	2.7591	99.9926
217905_at	2	57485.1	346.045	98.8033
201584_s_at	2	63120.1	16.0219	99.9492
205036_at	2	90428	1044.38	97.7165
212655_at	2	769.992	29.781	92.5526
200894_s_at	2	14.6798	0.3514	95.3249
203062_s_at	2	5.7126	0.3514	88.4115
205909_at	2	243.114	0.3514	99.7114
212168_at	2	254.979	0.3514	99.7248
218447_at	2	792.835	98.3235	77.9335
201827_at	2	1408.21	52.3982	92.8252
200683_s_at	2	5.2207	0.3514	87.3884
201627_s_at	2	3.0041	0.3514	79.0572
207507_s_at	2	167437	0.8742	99.999
212320_at	2	419.952	0.3514	99.8328
208739_x_at	2	742.102	28.8676	92.5114
215030_at	2	15043	0.66	99.9912
218444_at	2	13.441	0.3514	94.905
218482_at	2	3312.6	0.3514	99.9788
201388_at	2	24533.1	10.7078	99.9127
201714_at	2	1400.24	0.3514	99.9498
211302_s_at	2	347.815	4.0175	97.7163
212348_s_at	2	389.053	0.3514	99.8195
201231_s_at	2	29.5715	0.3514	97.6516
210175_at	2	5.0014	0.3514	86.8717
215773_x_at	2	8830.71	3.4048	99.9229
201853_s_at	2	87767.4	4115.09	91.0427
218270_at	2	60.3502	2.2354	92.8564
44040_at	2	23.6635	0.3514	97.0738
208309_s_at	2	55.6615	0.3514	98.7454
213753_x_at	2	1677.95	2.2978	99.7265
202303_x_at	2	129.082	0.9746	98.5012
217786_at	2	58093.8	8.9085	99.9693
201013_s_at	2	2131.61	0.5942	99.9443
202159_at	2	4592.16	32.4714	98.5957
208778_s_at	2	27767.8	247.869	98.2305
218897_at	2	47004.2	1301.33	94.6121
209214_s_at	2	723.044	0.7827	99.7837
31807_at	2	692.875	45.4225	87.6953
209592_s_at	2	1146.36	247.065	64.5385
203534_at	2	16080.9	538.686	93.5174
208115_x_at	2	1.9399	0.3514	69.3301
208910_s_at	2	531.451	22.4073	91.9086
203347_s_at	2	2973.63	15.0516	98.9928
201993_x_at	2	209.699	1.1891	98.8723
202469_s_at	2	4155.22	9.6379	99.5372
217933_s_at	2	5.7122	0.3514	88.4107
203613_s_at	2	19.4352	0.3514	96.4485
212453_at	2	107.26	0.9258	98.2885
47105_at	2	5.2959	0.3514	87.5563
200942_s_at	2	2.0627	0.3514	70.8909
204593_s_at	2	26.2372	0.3514	97.3571
209646_x_at	2	59.1688	1.0557	96.494
200060_s_at	2	162.232	32.9813	66.21
200749_at	2	1040.25	3.1491	99.3964
201625_s_at	2	15.9068	0.3514	95.6777
202757_at	2	0.8515	0.3514	41.5793
203489_at	2	8192.88	8.1178	99.802
203690_at	2	139927	173.666	99.7521
217907_at	2	4478.69	2.7444	99.8775
218500_at	2	192916	3.8485	99.996
218517_at	2	14.4049	0.3514	95.2378
219600_s_at	2	23.1563	0.3514	97.0107
55662_at	2	0.844	0.3514	41.2113
200950_at	2	1779.17	0.3514	99.9605
201863_at	2	49.2206	0.3514	98.5824
202521_at	2	4.4584	0.3514	85.3897
202725_at	2	3963.75	25.8487	98.7042
203660_s_at	2	31.0464	0.3514	97.7619
204348_s_at	2	45.6635	0.3956	98.2824
205744_at	2	1.5321	0.3514	62.6889
208657_s_at	2	3688.14	26.1317	98.5929
211576_s_at	2	55726.1	2598.74	91.0887
212116_at	2	48286.9	0.4295	99.9982
212513_s_at	2	23.2617	1.5552	87.4663
214086_s_at	2	3719.1	5.3709	99.7116
214214_s_at	2	66317.2	1.1699	99.9965
222231_s_at	2	576.459	0.3514	99.8782
201572_x_at	2	720.455	61.93	84.1689
209264_s_at	2	4403.85	4.2029	99.8093
215952_s_at	2	645.341	12.3325	96.2497
222199_s_at	2	22.1753	1.2584	89.2603
200812_at	2	8930.79	460.253	90.198
214728_x_at	2	222.994	12.6257	89.283
218777_at	2	5422.84	13.2141	99.5138
202009_at	2	119.32	0.3514	99.4128
202441_at	2	15.7561	0.3514	95.6373
203694_s_at	2	2284.42	16.0473	98.6049
217880_at	2	181.865	2.5938	97.1876
218104_at	2	173.389	0.3514	99.5955
202715_at	2	712.714	17.8779	95.1059
212271_at	2	652.419	4.2968	98.6914
212333_at	2	3726.25	1.1085	99.9405
217776_at	2	17.2063	0.3514	95.9976
218460_at	2	2294.07	0.3514	99.9694
210691_s_at	2	223.983	2.6994	97.6183
211999_at	2	382.208	4.2844	97.7829
218580_x_at	2	17.8132	0.3514	96.1314
200666_s_at	2	43.4301	0.3514	98.3949
202268_s_at	2	1963.64	3.8517	99.6085
203721_s_at	2	7134.28	5.4539	99.8472
208766_s_at	2	3.4234	0.3514	81.3839
218392_x_at	2	7770.06	909.05	79.052
203602_s_at	2	18.6304	0.3801	96.0015
212296_at	2	17.6611	0.3514	96.0987
201767_s_at	2	2.4444	0.3514	74.8648
201491_at	2	95.2316	0.3514	99.2648
201614_s_at	2	11974.2	298.377	95.1375
209694_at	2	167.731	0.3514	99.5819
209974_s_at	2	13.7661	0.8139	88.835
210942_s_at	2	11975.9	1006.74	84.491
202870_s_at	2	299.34	0.3514	99.7655
205565_s_at	2	3.8053	0.3514	83.0943
210672_s_at	2	43.7989	10.3492	61.7746
203537_at	2	152.343	11.7015	85.7337
212995_x_at	2	10943.5	2070.59	68.1792
217755_at	2	3252.2	585.133	69.5031
213149_at	2	10391.7	774.924	86.1207
219371_s_at	2	385.813	71.9078	68.5801
202347_s_at	2	392.635	1.3136	99.3331
216607_s_at	2	2.5451	0.3514	75.7385
201180_s_at	2	0.8267	0.3514	40.3503
207688_s_at	2	33.4379	0.3514	97.9203
212856_at	2	401.187	39.3506	82.1352
216867_s_at	2	814.261	13.0777	96.8386
219035_s_at	2	45.5305	1.4818	93.6961
201705_at	2	403.479	55.6608	75.7543
203150_at	2	172.941	1.3373	98.4653
211804_s_at	2	51.0659	0.3514	98.6333
218159_at	2	400.426	9.4237	95.4014
218989_x_at	2	71.3524	0.5453	98.483
205891_at	2	111.726	88.4526	11.6262
212072_s_at	2	77.4662	0.4294	98.8976
218860_at	2	0.8041	0.3514	39.1819
205024_s_at	2	2.1348	0.3514	71.7352
207428_x_at	2	7.7974	0.6203	85.2621
218366_x_at	2	1476.31	78.5524	89.8959
219357_at	2	47.5578	21.4052	37.9226
210654_at	2	197.848	24.2724	78.1449
211609_x_at	2	9033.24	3065.07	49.3307
212691_at	2	181.06	127.724	17.2729
203270_at	2	57.8888	1.161	96.0676
207856_s_at	2	53.8218	0.3514	98.7028
212004_at	2	85.2691	36.3003	40.2805
201680_x_at	2	7.2015	0.3514	90.696
212789_at	2	3.2379	0.3514	80.4215
202993_at	2	2.0543	0.3514	70.7887
209680_s_at	2	3.5409	0.3514	81.9457
217720_at	2	167.678	37.9604	63.0805
201642_at	2	7.7335	1.2687	71.8127
220444_at	2	9.2137	3.5101	44.8266
208794_s_at	2	354.12	205.895	26.468
217855_x_at	2	26.0289	2.103	85.0488
200064_at	2	153.251	23.8766	73.0401
200069_at	2	609.159	223.436	46.3278
200886_s_at	2	17306.1	5757.62	50.072
203678_at	2	496.105	16.7162	93.4807
203805_s_at	2	273.024	171.962	22.7113
204117_at	2	2.816	1.0185	46.8758
205596_s_at	2	3.6324	0.3514	82.3602
208835_s_at	2	1.7947	0.3514	67.2548
209137_s_at	2	73.6167	18.3741	60.0524
210758_at	2	239.854	8.7751	92.9412
211951_at	2	4.8573	1.9125	43.4996
212139_at	2	69348.2	1189.75	96.6266
212983_at	2	10698.6	3837.03	47.2053
213859_x_at	2	1805.84	18.593	97.9618
216306_x_at	2	1922.07	210.551	80.2543
217466_x_at	2	1.9304	0.3514	69.2033
218095_s_at	2	174.666	65.5867	45.4018
218170_at	2	355.542	22.4692	88.1119
218358_at	2	7827.85	154.634	96.1257
218516_s_at	2	12996.9	2938.71	63.1176
221482_s_at	2	5107.19	877.891	70.664
33760_at	2	5777.36	208.91	93.0204
34449_at	2	199.964	10.1305	90.3563
209549_s_at	2	28.2943	2.3094	84.9076
218060_s_at	2	20.6879	5.1171	60.3406
208975_s_at	2	13.7422	1.0956	85.2319
218529_at	2	544.652	163.817	53.7546
204365_s_at	2	0.8184	0.3514	39.9269
218459_at	2	2062.08	388.43	68.2981
200753_x_at	2	1417.38	128.724	83.3486
203362_s_at	2	482.144	86.7373	69.506
206621_s_at	2	3095.44	497.519	72.3059
210692_s_at	2	3621.3	294.309	84.9674
215223_s_at	2	1261.76	122.897	82.2488
206752_s_at	2	174.524	26.0053	74.0634
202536_at	2	802.991	156.522	67.3747
210776_x_at	2	6.0082	0.3514	88.9501
205811_at	2	18.2543	0.749	92.1168
208002_s_at	2	7151.8	2146.94	53.823
212648_at	2	26.5638	3.5843	76.2219
201772_at	2	1903.67	298.994	72.8516
203465_at	2	5789.41	1019.77	70.0472
213234_at	2	2.1484	0.3514	71.8887
214259_s_at	2	6367.36	2138.2	49.7222
216457_s_at	2	5266.84	1819.22	48.6536
202858_at	2	1589.58	750.529	35.8553
204819_at	2	1.693	0.3514	65.6263
216841_s_at	2	7990.93	3051.56	44.7306
213372_at	2	43.741	1.293	94.2579
212723_at	2	1.1931	0.3514	54.5018
221489_s_at	2	0.8865	0.3514	43.2313
205742_at	2	1.1832	0.3514	54.2059
217956_s_at	2	25.7367	1.2461	90.7635
201024_x_at	2	2.267	0.4161	68.9806
201031_s_at	2	1737.8	442.907	59.3795
210293_s_at	2	5.6967	1.0682	68.4205
211571_s_at	2	57.3728	3.763	87.6898
212986_s_at	2	74.8948	28.3976	45.0151
209336_at	2	727.435	398.374	29.2288
219548_at	2	146.38	53.3562	46.5735
206307_s_at	2	0.7213	0.3514	34.4907
200870_at	2	0.5759	0.3514	24.2137
222037_at	2	3.1025	1.1015	47.5985
215646_s_at	2	64.0844	37.733	25.881
200705_s_at	2	2.5539	0.6817	57.8635
213811_x_at	2	9.3399	5.4981	25.8912
201115_at	2	12.0604	2.3664	67.1942
208821_at	2	1.6245	0.485	54.0202
37577_at	2	66.6749	25.5546	44.5847
201385_at	2	0.4657	0.3514	13.9969
201433_s_at	2	0.5328	0.3514	20.5199
217960_s_at	2	0.542	0.3514	21.3371
202586_at	2	83.2466	45.777	29.0409
208972_s_at	2	1.1487	0.3514	53.1553
204565_at	2	388.082	255.919	20.5221
209358_at	2	3.0559	1.9008	23.3044
212005_at	2	31.3182	15.4073	34.052
220865_s_at	2	28.428	6.1754	64.3077
202928_s_at	2	7.6838	3.1454	41.9085
206683_at	2	28.252	16.5563	26.1017
217894_at	2	116.056	86.7125	14.4713
218305_at	2	81.8186	31.7288	44.1135
200935_at	2	3.2042	1.3285	41.3802
210048_at	3	5203.3	3462.31	20.0908
214672_at	3	101.459	61.8438	24.2588
218896_s_at	3	13.0849	2.1903	71.322
202961_s_at	3	1148.01	533.51	36.5444
218347_at	3	23447.7	2437.08	81.1698
221596_s_at	3	660.527	343.247	31.6087
206993_at	3	94.4063	79.9293	8.3041
212559_at	3	523.997	35.3589	87.3573
208436_s_at	3	378.864	36.4126	82.4635
213142_x_at	3	4225.26	2155.58	32.4357
215304_at	3	110.53	21.3506	67.6214
216682_s_at	3	3.6026	2.4902	18.2576
219117_s_at	3	2566.35	848.442	50.3079
220990_s_at	3	2362.2	1783.52	13.9585
221518_s_at	3	10152.4	2120.28	65.447
200004_at	3	1044.39	98.3013	82.7948
203037_s_at	3	51.7735	3.8378	86.1976
212486_s_at	3	680.94	453.003	20.1013
214830_at	3	9824.03	298.49	94.1025
219311_at	3	189.716	2.785	97.1065
160020_at	3	124.383	18.569	74.0207
201780_s_at	3	57959.3	5304.64	83.2301
212134_at	3	1603.57	31.8808	96.1013
212195_at	3	4642.37	716.023	73.2747
216581_at	3	455.961	202.164	38.5636
221903_s_at	3	4077.08	142.637	93.2395
202778_s_at	3	30846	2596.84	84.47
202853_s_at	3	1097.85	91.7553	84.5738
209306_s_at	3	15740	3140.65	66.7316
212338_at	3	31803	2530.46	85.2595
219295_s_at	3	521.979	135.825	58.7035
220943_s_at	3	471.621	116.045	60.5064
221547_at	3	2385.14	606.208	59.4693
207949_s_at	3	1091.02	127.18	79.1201
210479_s_at	3	72.5841	0.4764	98.6957
214473_x_at	3	223204	6770.77	94.1117
215285_s_at	3	1639.27	88.4292	89.7634
217529_at	3	116.675	24.6103	65.1622
217707_x_at	3	10075.5	521.318	90.1609
218236_s_at	3	310245	7370.38	95.3589
219848_s_at	3	8997.62	42.6678	99.0561
220149_at	3	991.686	117.522	78.8098
221599_at	3	21699.6	399.619	96.3834
36920_at	3	124040	4733.04	92.649
56919_at	3	103989	107.978	99.7925
202711_at	3	4720.09	393.211	84.6201
203474_at	3	30221.5	220.443	98.5517
206542_s_at	3	5561.97	8.7204	99.6869
207318_s_at	3	4892.07	97.9692	96.0734
209221_s_at	3	209.99	145.34	18.1943
209307_at	3	6209.19	82.4298	97.3797
210793_s_at	3	76919.7	164.042	99.5744
212549_at	3	167965	51.8554	99.9383
213184_at	3	13.1566	1.1979	83.3095
213271_s_at	3	9592.46	25.4376	99.471
216438_s_at	3	296009	714.691	99.5183
218374_s_at	3	484862	251.1	99.8965
222150_s_at	3	480695	1020.83	99.5762
200671_s_at	3	1219.62	78.7041	87.876
201687_s_at	3	10026.6	922.418	83.1506
202227_s_at	3	39580.4	313.508	98.4283
202982_s_at	3	145937	1781.3	97.5882
203232_s_at	3	1424.71	27.7181	96.1832
203529_at	3	1053.63	3.5444	99.3295
208783_s_at	3	6056.93	28.9915	99.0473
208899_x_at	3	661304	187.498	99.9433
209222_s_at	3	1063.08	40.0415	92.7404
210540_s_at	3	252.004	17.623	86.9279
211684_s_at	3	342261	201.591	99.8823
211793_s_at	3	13.3947	0.3514	94.8879
213253_at	3	3299	1044.87	51.8921
214236_at	3	68118.7	141.218	99.5862
214960_at	3	11237.1	236.12	95.884
200729_s_at	3	783.169	80.3348	81.3933
200739_s_at	3	368851	145.715	99.921
202884_s_at	3	1162.99	132.167	79.5905
203039_s_at	3	1057.66	64.5428	88.4971
203340_s_at	3	292.05	1.3124	99.1053
203871_at	3	164.702	2.4842	97.0282
204361_s_at	3	1047.09	1.5686	99.7008
204980_at	3	10833.2	560.207	90.1661
205300_s_at	3	111.391	2.1089	96.2838
211084_x_at	3	73346.4	50.0657	99.8636
212082_s_at	3	14505.5	21.4473	99.7047
212317_at	3	2833.37	15.5452	98.9087
212565_at	3	70.1886	11.5898	71.6557
213107_at	3	30.4409	5.2667	70.5011
214129_at	3	24.8371	0.9865	92.3599
217445_s_at	3	200057	559.921	99.4418
200901_s_at	3	32600.2	45.7022	99.72
201829_at	3	134017	173.975	99.7407
202520_s_at	3	6453952	44.799	99.9986
203739_at	3	433095	256.552	99.8816
204523_at	3	126040	5767.61	91.2485
204571_x_at	3	229618	38.6826	99.9663
204766_s_at	3	28064.7	730.464	94.9265
208877_at	3	64301.4	193.93	99.3986
209073_s_at	3	338545	27.2759	99.9839
209284_s_at	3	250.607	3.188	97.4877
210718_s_at	3	67.7641	6.7595	81.8593
212807_s_at	3	3100699	491.866	99.9683
213263_s_at	3	45036.9	158.952	99.2966
218122_s_at	3	110089	17.4774	99.9683
221845_s_at	3	27612.7	140.336	98.9887
34031_i_at	3	1.05242e+06	910.766	99.8271
200713_s_at	3	80138.4	81.3066	99.7973
202221_s_at	3	3589.65	35.5243	98.0401
203231_s_at	3	13802.8	2.328	99.9663
205191_at	3	2271.8	8.4052	99.2628
207956_x_at	3	239849	2.0958	99.9983
211089_s_at	3	85780.4	193.499	99.5499
211985_s_at	3	12063.5	57.8682	99.0452
212301_at	3	102554	38.5145	99.9249
217947_at	3	210482	3.1379	99.997
221780_s_at	3	11603.7	494.013	91.833
202762_at	3	530024	8.1352	99.9969
205930_at	3	68208.7	55.7811	99.8366
211778_s_at	3	189656	1500.03	98.4306
212800_at	3	392.574	6.1732	96.9037
213619_at	3	1.36528e+06	903.562	99.8677
216899_s_at	3	12.2153	0.3514	94.408
202883_s_at	3	31550	137.485	99.1322
207243_s_at	3	55857.9	0.3514	99.9987
213788_s_at	3	717558	2202.25	99.3881
215886_x_at	3	1679.77	18.755	97.7916
211071_s_at	3	171536	12758.4	86.1544
213893_x_at	3	73526.1	225.689	99.388
210191_s_at	3	47.0018	4.2873	83.2818
210387_at	3	72827.7	346.976	99.0516
211758_x_at	3	745773	1274.74	99.6587
220775_s_at	3	9.1821	0.3514	92.6289
205480_s_at	3	678835	4090.58	98.802
203375_s_at	3	1259.07	22.1571	96.5413
208642_s_at	3	36.2668	27.3263	14.0588
215483_at	3	64.2886	35.4277	28.9431
217028_at	3	4545.96	77.2014	96.6602
201096_s_at	3	394397	6572.13	96.7219
209363_s_at	3	1.96814e+06	116.253	99.9882
216387_x_at	3	145782	654.173	99.1065
209362_at	3	116253	24.8397	99.9573
214706_at	3	3149.43	13.4161	99.1516
215093_at	3	8940.19	107.225	97.6297
200712_s_at	3	162644	1223.61	98.5066
201630_s_at	3	7.7849	0.7905	81.5631
202423_at	3	599813	2679.59	99.1105
202886_s_at	3	107506	85.3702	99.8413
203013_at	3	16350.6	995.722	88.5195
204012_s_at	3	962.216	58.3292	88.569
207358_x_at	3	5.4027	2.334	39.6641
209509_s_at	3	114539	1739.42	97.0082
210338_s_at	3	7951.42	161.474	96.0193
210752_s_at	3	29.7872	4.543	73.5335
210766_s_at	3	1761.32	124.002	86.8456
211919_s_at	3	131.285	2.7063	95.9605
212181_s_at	3	24217.5	65.447	99.461
212627_s_at	3	2929.8	35.4984	97.6057
217448_s_at	3	38.2568	0.3514	98.1799
217925_s_at	3	1092.63	1.9318	99.647
201635_s_at	3	47.4031	0.3514	98.5285
221743_at	3	70.7252	23.263	50.498
203008_x_at	3	38463	5547.25	74.7911
208629_s_at	3	80240.9	192.92	99.5203
212932_at	3	5452.75	37.5057	98.6337
213628_at	3	38371.8	890.904	95.4618
32091_at	3	67804	194.421	99.4282
209201_x_at	3	15.5813	2.1812	75.4405
212840_at	3	2641.51	34.2699	97.4385
204516_at	3	135025	18414.1	75.9981
57539_at	3	3.2637	0.7405	63.0132
201286_at	3	692.053	10.2152	97.0908
200042_at	3	3402.43	309.862	83.3062
200740_s_at	3	197229	6967.11	93.176
201023_at	3	1386.34	97.4741	86.8617
201097_s_at	3	3733.31	517.804	75.6391
201346_at	3	2806.77	348.644	77.9019
201594_s_at	3	14.0156	4.0698	54.9935
202125_s_at	3	105414	4170.85	92.3879
202206_at	3	2556.74	150.146	88.9064
202846_s_at	3	85133	3903.84	91.231
204082_at	3	6173.24	2166.66	48.0411
204683_at	3	6480.39	150.172	95.4703
205453_at	3	6783.51	962.726	75.1434
205887_x_at	3	156.948	15.56	81.9602
209213_at	3	60735.2	11750.7	67.5779
209572_s_at	3	4347.24	237.542	89.6378
212084_at	3	44.047	14.7565	49.8109
213789_at	3	13877.1	2879.27	65.6337
217918_at	3	2229.91	418.815	68.3761
218318_s_at	3	17868.1	5174.94	55.0845
218339_at	3	30168.7	2085.48	87.0685
221499_s_at	3	3361.55	22.2575	98.6845
221618_s_at	3	2374.58	1160	34.3626
208858_s_at	3	63.8763	10.0016	72.924
212457_at	3	5262.87	675.144	77.2603
213552_at	3	1.7317	0.3514	66.2647
219485_s_at	3	8765.75	249.415	94.4668
207871_s_at	3	5350.89	774.944	74.6992
209049_s_at	3	3516.71	525.419	74.0029
211069_s_at	3	99.463	32.7666	50.4399
201928_at	3	14450.4	1927.96	76.4572
204020_at	3	309324	18666.9	88.6174
209565_at	3	37957.3	9503.43	59.9524
205366_s_at	3	1053.87	442.307	40.8753
213312_at	3	237.553	20.5815	84.0537
220936_s_at	3	9.3208	3.2662	48.1024
211966_at	3	418.019	126.143	53.6378
203818_s_at	3	13108.4	2735.41	65.4703
214430_at	3	434.09	259.626	25.1492
201826_s_at	3	470096	120701	59.1395
203194_s_at	3	104.983	16.5921	72.7047
213995_at	3	100.483	27.3752	57.179
214117_s_at	3	3726.65	783.959	65.2394
221954_at	3	2476.04	550.456	63.6242
216593_s_at	3	3193.42	872.05	57.0997
208091_s_at	3	17429.1	7855.69	37.8623
215931_s_at	3	9977.65	2532.74	59.5098
200751_s_at	3	30339.6	3669.47	78.4206
210790_s_at	3	9523.31	908.733	82.5781
202784_s_at	3	52526.4	21665	41.5971
214708_at	3	373.051	172.382	36.7908
218483_s_at	3	8362.72	3017.51	46.9692
213546_at	3	92.6975	44.5814	35.0498
213304_at	3	5405.55	3630.91	19.6387
221423_s_at	3	1452.06	426.673	54.5786
205851_at	3	31.5428	15.4468	34.2544
209725_at	3	7.7355	0.8176	80.8808
206920_s_at	3	0.4762	0.3514	15.0833
218866_s_at	3	920.252	630.652	18.673
212415_at	3	11144.9	7371.87	20.3764
212586_at	3	27.757	19.9546	16.3532
202618_s_at	3	597.591	393.319	20.6146
212166_at	3	3577.35	2084.95	26.3567
207180_s_at	3	0.4815	0.3514	15.6207
210110_x_at	4	9219.17	7641.42	9.3576
201250_s_at	4	514.983	347.054	19.4805
204779_s_at	4	2.1291	1.2503	26.0039
218023_s_at	4	5.1037	0.5776	79.6656
219764_at	4	18.2984	6.3379	48.548
217841_s_at	4	2018.7	129.539	87.94
212770_at	4	50.2163	0.4507	98.2208
218117_at	4	30487.6	21.1966	99.861
201764_at	4	18111.4	112.838	98.7617
219704_at	4	359.566	3.2126	98.2289
201089_at	4	394400	2646.76	98.6668
201558_at	4	281137	1004.49	99.288
201905_s_at	4	142773	122840	7.5043
202176_at	4	162.317	0.7249	99.1108
202190_at	4	4.3123	0.3514	84.9319
202282_at	4	282997	195.179	99.8622
202911_at	4	5371.84	823.502	73.4154
204462_s_at	4	8055.23	43.6994	98.9209
209797_at	4	1260.63	176.559	75.4299
210024_s_at	4	91286.5	8.3502	99.9817
210844_x_at	4	103336	94.6091	99.8171
211318_s_at	4	55189.4	285.443	98.9709
213504_at	4	43975	68.1392	99.6906
214097_at	4	2637.14	285.187	80.4822
215947_s_at	4	1043.85	0.3514	99.9327
218416_s_at	4	2260.39	37.5478	96.7321
201317_s_at	4	202911	485.809	99.5223
201405_s_at	4	912692	1709.67	99.6261
201515_s_at	4	740.568	0.3514	99.9052
202234_s_at	4	7139.29	28.3956	99.2077
202235_at	4	9735.28	145.792	97.0491
202276_at	4	88527.1	138.641	99.6873
202562_s_at	4	658.641	12.8483	96.1732
203336_s_at	4	88148.5	1417	96.8358
203436_at	4	10523.4	0.3514	99.9933
203798_s_at	4	37937.8	117.917	99.3803
204023_at	4	39113.9	172.955	99.1195
205055_at	4	3468.9	1.0113	99.9417
205425_at	4	23859	26.5936	99.7773
208659_at	4	6322.99	0.5525	99.9825
208827_at	4	5160.42	0.3514	99.9864
209092_s_at	4	3040.01	284.975	82.8586
210196_s_at	4	3932.45	3.4622	99.8241
212787_at	4	21420.7	321.711	97.0407
217923_at	4	438.728	0.3514	99.84
218622_at	4	9402.28	31.1423	99.3397
218987_at	4	5788.43	14.4238	99.5029
221484_at	4	40.0559	0.3514	98.2609
200682_s_at	4	158.421	15.4719	82.2053
200786_at	4	320357	18.9961	99.9881
201125_s_at	4	3550.31	25.0278	98.6
201157_s_at	4	371.782	115.382	52.6312
201434_at	4	247862	1117.13	99.1026
202854_at	4	3564.18	15.5437	99.1316
202924_s_at	4	2792.64	0.6388	99.9543
202925_s_at	4	45.3415	0.6475	97.1839
202985_s_at	4	720590	51.4842	99.9857
203171_s_at	4	2966.9	0.3514	99.9763
203460_s_at	4	36692.2	736.481	96.0646
203664_s_at	4	1722.45	163.33	82.6777
204254_s_at	4	8185.35	458.642	89.3882
204469_at	4	24971.3	82.6724	99.34
205591_at	4	301806	757.274	99.4994
208445_s_at	4	12248.2	920.446	86.0207
208637_x_at	4	115765	24.5279	99.9576
208742_s_at	4	184261	92.5706	99.8996
209161_at	4	445.309	12.1322	94.6956
209297_at	4	2.3582	0.7607	51.2218
209900_s_at	4	13684.5	215.939	96.8931
210426_x_at	4	16670.4	20.315	99.7566
212776_s_at	4	295059	1614.55	98.9116
213085_s_at	4	2287.33	2.4658	99.7846
213305_s_at	4	86723.9	178.024	99.5903
213511_s_at	4	5102.37	6.3172	99.7527
216095_x_at	4	721.829	0.3514	99.9027
218134_s_at	4	278318	110.248	99.9208
218163_at	4	425155	784.329	99.6317
218315_s_at	4	12189.7	5.4463	99.9107
218356_at	4	295495	2165.24	98.5452
218982_s_at	4	236566	930.896	99.2161
219142_at	4	87989.9	503.105	98.863
219987_at	4	19403.4	296.454	96.9903
200028_s_at	4	54.5098	1.566	94.4149
200765_x_at	4	16387.1	1083.02	87.6015
200830_at	4	14555.9	238.067	96.7816
201136_at	4	38701	1165.44	94.1533
201232_s_at	4	2951.02	27.0329	98.1845
202012_s_at	4	9152.71	20.0751	99.5623
202207_at	4	181176	21144.2	79.0983
203405_at	4	200454	1100.64	98.9078
203454_s_at	4	4575.06	0.3514	99.9846
203606_at	4	72.4572	3.1203	91.7427
204281_at	4	126.451	0.3514	99.4458
204883_s_at	4	992.625	0.3625	99.927
206022_at	4	92598.7	1980.95	95.8111
206670_s_at	4	216586	2116.58	98.0644
209445_x_at	4	177905	360.919	99.5951
210104_at	4	34.6086	0.3645	97.9154
210290_at	4	16843.2	202.638	97.6224
210926_at	4	26.111	0.3514	97.3444
211160_x_at	4	17026.6	14.9912	99.8241
212242_at	4	23361.5	1078.39	91.1751
212378_at	4	52027	58.7094	99.7746
212877_at	4	1220.38	0.3514	99.9424
214456_x_at	4	7049.48	355.4	90.4009
216088_s_at	4	125390	24.4128	99.9611
217140_s_at	4	14908.8	0.3896	99.9948
217958_at	4	14647.2	0.3514	99.9952
218271_s_at	4	19136	40.5206	99.5774
218417_s_at	4	358778	17366.7	90.7659
218491_s_at	4	20339	145.314	98.5812
219440_at	4	4696.73	425.651	83.3807
219526_at	4	47128.1	90.8679	99.6151
219715_s_at	4	6197.63	1332.6	64.6065
220495_s_at	4	4048.01	63.1386	96.9284
221021_s_at	4	48271.5	2131.18	91.5434
221513_s_at	4	94892.5	9034.68	82.6135
221641_s_at	4	233794	1944.63	98.3502
41037_at	4	1728.79	0.3796	99.9561
54051_at	4	1272.53	5.3229	99.1669
201114_x_at	4	2026.21	13.7954	98.6475
201569_s_at	4	1141.42	2.7416	99.5208
202083_s_at	4	164455	1322.7	98.4042
203349_s_at	4	16.3469	1.3709	84.5247
203797_at	4	10797.6	3377	52.3513
210762_s_at	4	3212.49	0.3514	99.9781
211564_s_at	4	53853.6	5.9695	99.9778
212038_s_at	4	3947.3	27.5231	98.6151
214011_s_at	4	88.2308	0.3514	99.2067
214527_s_at	4	155708	175.279	99.7751
217499_x_at	4	41433.3	7315.17	69.9881
217811_at	4	1152.68	6.3018	98.9125
218678_at	4	32576.7	3204.45	82.0886
219220_x_at	4	524.703	10.7847	95.972
219539_at	4	761.272	6.9514	98.1903
219940_s_at	4	169.644	3.7655	95.6571
220233_at	4	337342	5153.22	96.9908
220239_at	4	1040.38	50.8461	90.6809
221492_s_at	4	60.7355	0.3514	98.8496
221601_s_at	4	106.764	1.1219	97.9203
200951_s_at	4	6845.47	1.5256	99.9554
200982_s_at	4	362934	146677	42.4356
202078_at	4	12277.4	1537.97	77.7354
202568_s_at	4	123.778	0.3514	99.4339
202628_s_at	4	6191.86	0.3514	99.9887
203094_at	4	5680.33	76.4312	97.3446
203771_s_at	4	44771.2	7147.89	72.4652
204957_at	4	3757.72	2049.15	29.4233
209593_s_at	4	2465.88	8.6176	99.3035
213037_x_at	4	118.593	5.3917	91.3027
213360_s_at	4	2296.12	2.9902	99.7399
214639_s_at	4	14383.5	1130.22	85.4295
216568_x_at	4	15.337	0.3514	95.5208
218109_s_at	4	53.6688	5.9948	79.9048
218227_at	4	4085.93	56.6659	97.2642
218691_s_at	4	27436.2	67.0464	99.5124
219428_s_at	4	62.7638	6.0147	82.51
201325_s_at	4	156.582	2.355	97.0366
201973_s_at	4	12619.5	416.446	93.6108
202208_s_at	4	1463.51	111.915	85.7924
203956_at	4	36973.5	77.8856	99.5796
204624_at	4	37.8215	1.4353	92.6874
208191_x_at	4	842.205	311.151	46.0443
208810_at	4	4250.19	3.1273	99.8529
209455_at	4	17714.9	1.3007	99.9853
210510_s_at	4	247.021	0.3514	99.7159
210759_s_at	4	1335.54	4.9589	99.2601
213567_at	4	48696.2	1398.52	94.4165
213620_s_at	4	196.172	13.3961	87.2155
214175_x_at	4	186587	45526.1	60.7724
218201_at	4	283.005	14.9478	89.9663
219366_at	4	70.1588	0.3514	99.0034
220238_s_at	4	1831.89	6.1974	99.3257
53912_at	4	1827.55	17.2909	98.1255
200878_at	4	2072.11	0.7921	99.9236
201192_s_at	4	11.4433	2.7412	61.3497
202787_s_at	4	7.6299	0.3514	91.1954
203775_at	4	7503.31	1089.87	74.6341
205690_s_at	4	32686	29.4432	99.82
206154_at	4	8.6281	0.3514	92.1741
211043_s_at	4	21.2429	0.3514	96.7458
211464_x_at	4	51.5953	5.7385	79.9821
213119_at	4	8496.04	44.6414	98.9546
214130_s_at	4	1.1814	0.3514	54.152
217959_s_at	4	16086.5	2733.74	70.9489
219030_at	4	538.07	159.28	54.3184
219985_at	4	201.11	0.3514	99.6512
220018_at	4	53.4323	0.3514	98.6934
201321_s_at	4	102.179	41.9527	41.7855
201323_at	4	23.8266	1.8912	85.2928
202693_s_at	4	53179.5	342.303	98.7209
204881_s_at	4	181.432	16.511	83.3175
208691_at	4	31.0729	0.7677	95.1781
210732_s_at	4	24440.5	1450.53	88.7952
212998_x_at	4	6181.29	266.646	91.7293
214169_at	4	1086.5	22.4494	95.9512
219927_at	4	8.5267	0.3514	92.0848
201387_s_at	4	16.075	0.7901	90.6307
201532_at	4	14.5997	2.1421	74.4104
203776_at	4	153.632	10.0848	87.6802
204866_at	4	103.453	50.0592	34.7814
207768_at	4	166.81	6.948	92.0027
208723_at	4	50507.7	2413.18	90.8801
209724_s_at	4	120.946	1.3803	97.7433
210532_s_at	4	3614.52	61.7168	96.6424
212480_at	4	1557.95	2.3245	99.702
214505_s_at	4	8.5731	0.3514	92.1259
218018_at	4	20.5228	0.3514	96.6335
219481_at	4	1101.4	19.5725	96.5079
201190_s_at	4	2142.32	109.107	90.3077
201967_at	4	3.0833	0.7905	59.1853
209360_s_at	4	10421.2	396.306	92.6729
209944_at	4	9.5054	0.3514	92.8707
213170_at	4	124.949	4.434	93.1459
213508_at	4	157275	11173.3	86.7339
215495_s_at	4	11.5914	1.9735	70.9026
216860_s_at	4	216.962	47.0403	64.3637
218002_s_at	4	21.6171	4.4066	66.1341
218504_at	4	6386.75	127.528	96.0847
201053_s_at	4	115069	2043.01	96.511
201222_s_at	4	1.0012	0.3514	48.0432
201403_s_at	4	5.5911	0.3514	88.1746
202936_s_at	4	19826.3	5398.64	57.1961
203102_s_at	4	14.2194	0.3514	95.1772
204937_s_at	4	8635.6	88.186	97.9783
206777_s_at	4	18493.9	13712.9	14.8447
209432_s_at	4	243.667	25.1013	81.3212
209651_at	4	5487.34	87.4055	96.8642
218372_at	4	13.0173	0.6963	89.8448
219099_at	4	3.3219	1.3748	41.4584
202138_x_at	4	22.8449	2.1698	82.6515
207974_s_at	4	83.115	29.8799	47.1128
208898_at	4	20234.1	10922.4	29.8868
212351_at	4	1289.17	140.243	80.3775
212554_at	4	1.2127	0.3514	55.0704
201338_x_at	4	37347.4	5230.03	75.4329
220058_at	4	2482.08	31.3044	97.509
218659_at	4	14860	9295.76	23.0348
54632_at	4	1.7383	0.3514	66.371
213503_x_at	4	4.2834	0.3514	84.8381
218377_s_at	4	5588.74	2000.09	47.2885
218710_at	4	16.1259	0.3514	95.7352
201751_at	4	41.5329	3.4385	84.7082
206958_s_at	4	72.7404	40.943	27.9701
212733_at	4	2.4203	0.3514	74.6465
212799_at	4	123.784	14.6497	78.8351
201738_at	4	4.8493	0.483	81.8835
200002_at	4	4.3121	0.3514	84.9312
200788_s_at	4	3.9429	1.422	46.9891
201840_at	4	15.804	0.3514	95.6502
202026_at	4	3.4548	0.3514	81.5375
202491_s_at	4	7.1962	0.3514	90.6894
202623_at	4	26.7975	0.3514	97.4116
202908_at	4	8.8075	0.3514	92.3275
203367_at	4	1.8845	0.3514	68.5706
203576_at	4	2.8303	0.3514	77.9137
205937_at	4	4.457	0.3514	85.3855
205964_at	4	3.1604	0.3514	79.9895
207079_s_at	4	785.832	0.3514	99.9106
209233_at	4	30.5946	0.3514	97.7292
209396_s_at	4	3.8227	0.3514	83.1644
209503_s_at	4	607.073	0.3514	99.8843
212440_at	4	8.3651	0.3514	91.938
212510_at	4	161.317	0.3514	99.5653
212802_s_at	4	150.321	0.3514	99.5336
214280_x_at	4	4.4697	0.3514	85.4239
215088_s_at	4	7.8593	0.3514	91.4414
217785_s_at	4	3.4057	0.3514	81.296
218008_at	4	337.176	0.3514	99.7918
218984_at	4	278.527	0.3514	99.748
219149_x_at	4	2.9144	0.3514	78.4819
219798_s_at	4	16.2621	0.3514	95.7702
219881_s_at	4	4.8676	0.3514	86.5352
49077_at	4	1.3538	0.3514	58.7884
202084_s_at	4	1.201	0.4004	49.9964
207320_x_at	4	17.6702	1.5554	83.8191
209302_at	4	0.9177	0.3514	44.6285
222029_x_at	4	0.8821	0.3514	43.0289
204245_s_at	4	538.868	235.756	39.1301
210009_s_at	4	36.7729	15.8628	39.7261
211800_s_at	4	2452.35	921.187	45.3874
218194_at	4	0.5866	0.3514	25.0791
201904_s_at	4	67118.3	22984.4	48.9817
204219_s_at	4	144960	19788.9	75.9769
205303_at	4	0.9842	0.5486	28.4222
209118_s_at	4	37860.6	3355.51	83.7174
217773_s_at	4	14488	4527.98	52.3771
203542_s_at	4	7.8085	0.3514	91.3881
201144_s_at	4	55.8702	4.6357	84.677
209531_at	4	1119.97	583.199	31.5161
211029_x_at	4	5083.45	2319.46	37.3365
214334_x_at	4	36.6775	7.6699	65.4101
200876_s_at	4	480.143	188.329	43.6538
202243_s_at	4	29.3459	12.5432	40.1124
218526_s_at	4	4000.58	483.363	78.4403
32723_at	4	13580.7	6.26	99.9079
204675_at	4	717.996	51.5853	86.5939
201052_s_at	4	16.4985	1.6555	81.7614
1053_at	4	1620.75	186.274	79.3834
218558_s_at	4	37.4024	4.0062	80.6504
200867_at	4	340.134	31.3434	83.125
213610_s_at	4	1.3373	0.3514	58.3861
207431_s_at	4	3.9527	0.3514	83.6731
222056_s_at	4	1819.53	377.136	65.6628
220890_s_at	4	12714.3	2147.07	71.1053
202478_at	4	5692.17	3764.65	20.3823
208617_s_at	4	13.2613	5.6574	40.1925
202141_s_at	4	343.166	70.8745	65.7645
209711_at	4	1.6666	0.3514	65.1774
206662_at	4	24721.9	4771.63	67.6429
213145_at	4	1.9854	0.3514	69.9281
214356_s_at	4	110495	28852.2	58.5895
219204_s_at	4	0.6174	0.3514	27.4606
200056_s_at	4	7.9515	1.9772	60.1724
202422_s_at	4	0.4896	0.3514	16.437
217961_at	4	3.9745	0.464	79.0921
219477_s_at	4	866.529	311.949	47.059
204857_at	4	0.9094	0.3514	44.2605
204633_s_at	4	2.8724	0.5027	70.2089
202479_s_at	4	14.0902	7.761	28.9651
217144_at	4	26035.4	17267	20.2492
211596_s_at	4	5335.14	3199.5	25.0233
218501_at	4	11211.8	5630.63	33.1376
202935_s_at	4	0.5743	0.3514	24.088
201092_at	4	26.0645	6.119	61.9742
216326_s_at	4	1.449	0.3514	60.9683
220367_s_at	4	35597.7	11164	52.2514
201566_x_at	4	3.9832	0.8242	65.7117
208950_s_at	4	377.43	99.3755	58.3162
210891_s_at	4	1401.21	376.812	57.6145
214022_s_at	4	6806.09	2518.59	45.9802
209250_at	4	469.56	218.256	36.5365
216973_s_at	4	1.8634	0.3514	68.2711
201601_x_at	4	197.408	69.2699	48.0498
203255_at	4	346.362	140.919	42.1612
203409_at	4	4.4629	1.8217	42.0273
211998_at	4	2.5391	0.8712	48.9078
208948_s_at	4	178.056	77.9032	39.1284
213322_at	4	1513.18	1296.76	7.7021
221983_at	4	13701.9	11474.2	8.8485
203317_at	4	15.1061	8.3006	29.0748
214714_at	4	0.4938	0.3514	16.8498
209298_s_at	4	0.5069	0.3514	18.1191
204623_at	5	4.3074	3.5769	9.2655
221923_s_at	5	7.5901	2.2162	54.8002
212463_at	5	1074.62	204.798	67.9859
218072_at	5	20.7335	11.7699	27.5774
201400_at	5	1845.22	16.4039	98.2377
201523_x_at	5	219.53	11.178	90.3098
200631_s_at	5	1441.15	1.1248	99.844
200734_s_at	5	302.99	152.808	32.9493
57739_at	5	28.5086	0.5917	95.9331
200738_s_at	5	2035.4	22.6851	97.7955
203648_at	5	26.9394	0.488	96.4416
208660_at	5	3042.41	23.0077	98.4989
212740_at	5	687.989	32.4603	90.9889
221669_s_at	5	478.965	52.7049	80.1738
222132_s_at	5	21728.5	26.607	99.7554
202209_at	5	19673.8	10.0211	99.8982
208743_s_at	5	14593.8	75.2336	98.9743
212247_at	5	9961.24	82.8174	98.3509
217859_s_at	5	165.201	2.5028	97.0152
219939_s_at	5	12.0091	0.5545	91.1731
205740_s_at	5	153.321	2.4042	96.9123
212041_at	5	1079.53	162.33	73.8569
212626_x_at	5	18398.5	9.9847	99.8915
209533_s_at	5	21354.2	3.4917	99.9673
213008_at	5	4898.21	5.2642	99.7853
219161_s_at	5	688076	44.0767	99.9872
200916_at	5	272420	8.1752	99.994
201706_s_at	5	11207.8	71.193	98.7376
201929_s_at	5	431322	10.709	99.995
202016_at	5	305305	3190.18	97.9318
208689_s_at	5	544.143	1.0829	99.6028
209231_s_at	5	4500.72	1.2496	99.9445
210125_s_at	5	271336	146.166	99.8923
221876_at	5	1.0761	0.3514	50.7713
200837_at	5	1.42439e+06	133.982	99.9812
201927_s_at	5	151345	8.3567	99.989
211337_s_at	5	33131.2	5.1947	99.9686
217356_s_at	5	830452	82.6591	99.9801
201622_at	5	12445.9	5.2623	99.9155
202055_at	5	166.829	0.3514	99.5797
209279_s_at	5	854575	126.205	99.9705
209624_s_at	5	38371.8	41.827	99.7822
218082_s_at	5	1751.73	163.247	82.9506
200009_at	5	200110	108.287	99.8918
217781_s_at	5	1003.52	40.1736	92.3017
221742_at	5	2308.94	13.6964	98.8206
201478_s_at	5	19426.9	41.5666	99.573
210320_s_at	5	3779.2	5.3644	99.7165
216902_s_at	5	1.9863	0.3514	69.9385
221648_s_at	5	41326	19.5308	99.9055
203025_at	5	1244.43	19.4039	96.9293
216212_s_at	5	67967.2	213.597	99.3734
200813_s_at	5	183.98	1.7559	98.1093
200900_s_at	5	4300.68	65.4167	97.0034
212409_s_at	5	20026.3	270.601	97.3336
201671_x_at	5	212.468	61.1415	55.3075
200621_at	5	82794.8	13396.7	72.1458
200628_s_at	5	137.918	0.3531	99.4893
212257_s_at	5	3714.14	1.0112	99.9456
217651_at	5	3168.49	49.4494	96.9266
214756_x_at	5	956.19	2.1505	99.5512
217794_at	5	12105.2	7.0715	99.8832
217909_s_at	5	145899	110.853	99.8482
203885_at	5	2538.96	15.4682	98.7889
201672_s_at	5	154160	199.036	99.7421
217485_x_at	5	1111.56	17.5164	96.8972
212318_at	5	379236	16.156	99.9915
221770_at	5	255656	29.1815	99.9772
201002_s_at	5	39661.8	182.732	99.0828
219123_at	5	503958	1074.66	99.5744
200918_s_at	5	12.7884	1.048	84.8512
215438_x_at	5	16.1955	0.3514	95.7532
221735_at	5	169.141	0.4408	99.4802
218414_s_at	5	5.9434	0.5457	83.181
216976_s_at	5	128055	111.32	99.8263
210317_s_at	5	5719.11	315.193	89.5533
212570_at	5	7906.74	18.6482	99.5294
214975_s_at	5	12179.9	32.4026	99.4693
214732_at	5	13.8174	0.3581	94.9475
212544_at	5	50158.7	289.723	98.8514
201961_s_at	5	19.0353	0.3514	96.3752
219217_at	5	895.735	161.592	69.4338
217758_s_at	5	519.407	13.4912	94.9367
203545_at	5	27409.9	1523.92	89.4662
201423_s_at	5	1978.38	96.2987	90.7168
209247_s_at	5	504.743	27.378	89.7099
217806_s_at	5	1072.64	13.8624	97.4483
210966_x_at	5	379061	2217.27	98.8369
212049_at	5	5759.17	12.5869	99.5638
212728_at	5	3119.67	166.283	89.8792
204663_at	5	586979	558.484	99.8099
38043_at	5	294917	297.247	99.7986
201239_s_at	5	14324.7	306.335	95.8125
209513_s_at	5	163681	22.6396	99.9723
201508_at	5	1.39331e+06	183.849	99.9736
209498_at	5	836987	65.2189	99.9844
202781_s_at	5	23.7458	1.5829	87.5009
220945_x_at	5	121108	348.934	99.4254
201912_s_at	5	53.1046	12.0426	63.0297
213315_x_at	5	637814	2291.45	99.284
201175_at	5	74366	6047.1	84.9599
207414_s_at	5	195049	7.1385	99.9927
213127_s_at	5	87516.9	12.9693	99.9704
202418_at	5	666231	347.752	99.8957
218005_at	5	675845	5723.16	98.3206
201587_s_at	5	268710	1039.75	99.2291
207732_s_at	5	449.863	241.406	30.1558
214697_s_at	5	9863.97	482.026	90.6819
201554_x_at	5	9516.62	33.2545	99.3036
207622_s_at	5	246.044	66.7712	57.3095
201729_s_at	5	1.04363e+06	2318.99	99.5566
217379_at	5	15838.8	1767	79.9271
200872_at	5	23433.9	2248.58	82.4894
201032_at	5	395700	153.45	99.9225
209094_at	5	15561.3	180.621	97.7052
212183_at	5	161.622	10.7916	87.4817
201776_s_at	5	160413	441.611	99.4509
206302_s_at	5	956223	4892.2	98.982
200737_at	5	20169.2	3959.08	67.1831
221998_s_at	5	22415.4	532.36	95.3602
208611_s_at	5	458180	34.7448	99.9848
200660_at	5	87120.2	213.367	99.5114
201001_s_at	5	1169042	6221.63	98.9412
201674_s_at	5	6141.73	1091.88	69.811
201800_s_at	5	158520	8636.68	89.6663
202075_s_at	5	1953.22	33.5814	96.6196
202460_s_at	5	2583.06	10.0455	99.2252
204064_at	5	2391	0.8656	99.9276
204630_s_at	5	15986.5	102.761	98.7226
205807_s_at	5	517.877	2.8959	98.8878
206649_s_at	5	631408	9060.57	97.1706
207164_s_at	5	28.5872	0.4206	97.1004
208789_at	5	19347.6	68.6506	99.2929
209240_at	5	535.257	0.4995	99.8135
209580_s_at	5	10632	7226.76	19.0677
211622_s_at	5	489.003	62.9976	77.1748
211937_at	5	3699	188.816	90.2868
212040_at	5	104004	88.4194	99.8301
213047_x_at	5	286.573	149.939	31.3015
214112_s_at	5	1.56892e+06	1184.47	99.8491
215235_at	5	27995.5	3088.26	80.1294
217866_at	5	22855	4273.6	68.4937
218212_s_at	5	9.5847	0.8586	83.5574
219073_s_at	5	2.39591e+06	1389.17	99.8841
219206_x_at	5	303.211	0.5054	99.6672
220642_x_at	5	236482	86.1023	99.9272
202458_at	5	1.4725	0.6022	41.9514
209194_at	5	36911.5	2704.31	86.3473
213554_s_at	5	3593.68	101.218	94.5212
215195_at	5	32.4096	0.3514	97.855
216985_s_at	5	438.086	12.3692	94.5081
218900_at	5	102.646	24.6562	61.2635
222157_s_at	5	1692.92	8.4819	99.003
203997_at	5	217.849	79.8231	46.3685
208358_s_at	5	1095.75	386.03	47.8963
208502_s_at	5	3433.63	98.0808	94.4457
208991_at	5	26565.7	770.14	94.3653
218319_at	5	50123.6	907.593	96.443
218137_s_at	5	496494	3131.71	98.7464
200857_s_at	5	534269	13670.1	95.0104
201341_at	5	504321	4330.79	98.2971
211883_x_at	5	11055.1	2373.29	64.6526
205503_at	5	744.396	68.0472	83.2487
205805_s_at	5	8467.9	1089.03	77.2097
210791_s_at	5	13777.4	464.173	93.4814
206414_s_at	5	1.22192e+06	7709.12	98.7461
201240_s_at	5	390.101	166.707	40.1204
201318_s_at	5	18077.2	462.848	95.007
202378_s_at	5	48772.5	3404.71	86.9494
208727_s_at	5	9551.06	822.223	84.1473
209238_at	5	12944.1	884.928	87.2019
211769_x_at	5	201953	469.807	99.5358
212676_at	5	1.16228e+06	79766.2	87.1557
217877_s_at	5	49347.6	5427.2	80.1836
218182_s_at	5	25691.9	413.183	96.8345
221024_s_at	5	35038	26014.4	14.7801
203407_at	5	108.891	1.1613	97.8896
204554_at	5	7521.37	776.707	81.2798
201472_at	5	443098	22734.2	90.2393
212522_at	5	763.811	4.4179	98.8498
219269_at	5	89513.1	12690.3	75.1666
222244_s_at	5	130544	10128.8	85.5995
203364_s_at	5	46066.4	8911.88	67.5803
203895_at	5	304.952	84.9001	56.445
214845_s_at	5	7348.5	488.026	87.5448
202040_s_at	5	1536.46	217.692	75.1799
209027_s_at	5	63814.6	19622.9	52.9639
201962_s_at	5	40815.2	9743.9	61.4554
208944_at	5	58228.9	10164.5	70.2765
209500_x_at	5	2162.22	1361.21	22.7338
211495_x_at	5	2246.2	99.7862	91.493
207700_s_at	5	75597.2	33352.5	38.7744
218519_at	5	4937.14	907.186	68.955
205105_at	5	351257	40423.4	79.359
204049_s_at	5	20659.5	2604.59	77.6084
210264_at	5	32434.9	12180.4	45.398
213548_s_at	5	57822.8	3216.61	89.4605
220459_at	5	9306.25	1685.08	69.338
64488_at	5	73.3232	0.6609	98.2134
208773_s_at	5	3853.19	1126.45	54.7577
200757_s_at	5	12619.4	74.7757	98.8219
217506_at	5	7627.25	3817.95	33.283
204011_at	5	2158.84	15.1087	98.61
221039_s_at	5	46980.7	5112.81	80.3706
208753_s_at	5	5884.59	2251.16	44.66
214805_at	5	959.35	243.041	59.5737
203411_s_at	5	1190.12	139.618	79.0007
204394_at	5	159.405	102.723	21.6238
204616_at	5	31042.9	1578.7	90.3212
207564_x_at	5	23907.7	2607.78	80.3301
218727_at	5	35.8252	16.0589	38.0969
221058_s_at	5	11525.6	464.34	92.2545
200600_at	5	14941.2	4634.31	52.6519
200854_at	5	337282	4335.16	97.462
202066_at	5	88.3796	1.1014	97.5383
202671_s_at	5	320.57	20.4816	87.9892
217527_s_at	5	3.1343	0.9863	52.1277
220658_s_at	5	2873.92	482.731	71.2374
205070_at	5	2843.61	1250.48	38.9129
213742_at	5	1.1659	0.3514	53.6836
212811_x_at	5	16234.9	6899.08	40.3555
215245_x_at	5	57389.2	17230.8	53.8172
221311_x_at	5	41332.7	4828.18	79.0811
200756_x_at	5	8671.37	53.1615	98.7813
200803_s_at	5	21416.8	3899.65	69.1928
214168_s_at	5	6.5714	3.1618	35.0314
217845_x_at	5	153.906	79.5659	31.8412
200815_s_at	5	527.693	386.135	15.4907
201887_at	5	8957.32	5733.76	21.9423
218214_at	5	2355.53	217.817	83.0713
208916_at	5	1590.46	70.9561	91.4584
201536_at	5	3.3557	1.3031	44.0599
203590_at	5	1409.08	183.352	76.9721
209232_s_at	5	10653.8	279.143	94.8935
216048_s_at	5	594.709	126.45	64.9314
202331_at	5	64.6545	28.7118	38.4965
205434_s_at	5	4.6608	0.7991	70.7294
212952_at	5	34.3651	2.459	86.6448
221473_x_at	5	681.639	377.396	28.7283
202975_s_at	5	399.721	41.5325	81.1752
221516_s_at	5	0.7055	0.3514	33.5085
202143_s_at	5	5.0465	0.5517	80.291
208679_s_at	5	3022.6	16.8249	98.8929
218408_at	5	1.7262	0.3514	66.1752
201043_s_at	5	199.287	2.8933	97.1379
201305_x_at	5	57.8948	1.1185	96.2095
201479_at	5	6199.64	36.8372	98.8187
201543_s_at	5	10060.5	449.469	91.4468
201870_at	5	76.3219	12.1925	72.4508
201946_s_at	5	3714.45	444.023	78.6449
202591_s_at	5	1439.09	85.069	88.8373
203176_s_at	5	12.2402	0.3514	94.4191
203177_x_at	5	431.005	4.8344	97.7815
204113_at	5	155.025	87.3399	27.9268
204461_x_at	5	171.152	25.4441	74.1154
204928_s_at	5	39.5417	6.1766	72.9797
208967_s_at	5	3.0964	0.5605	69.3441
212388_at	5	7.1644	3.7121	31.7404
214959_s_at	5	2056.37	64.8685	93.8839
218715_at	5	203.425	11.225	89.5411
219081_at	5	3.3993	0.3514	81.2639
220746_s_at	5	919.687	1.5239	99.6692
76897_s_at	5	1.828	0.3656	66.663
212018_s_at	5	2.252	0.3514	73.0077
219675_s_at	5	1.0902	0.8079	14.875
213710_s_at	5	2.8034	2.4333	7.0679
210314_x_at	5	6546.1	1376.59	65.2495
213035_at	5	96.2867	60.4559	22.8596
204599_s_at	5	0.9457	0.3514	45.8208
218439_s_at	5	0.5904	0.3514	25.3814
210253_at	5	10.6368	7.5812	16.7728
211961_s_at	5	2008.97	1530.82	13.5078
200791_s_at	5	425393	133167	52.3178
209255_at	5	20440.4	3913.42	67.862
209499_x_at	5	1948.01	902.451	36.6803
209512_at	5	398414	57290.6	74.8563
201524_x_at	5	547.182	56.5883	81.255
203396_at	5	24.3633	11.6791	35.1925
211623_s_at	5	937.92	154.588	71.7004
204765_at	5	30911.5	17080.2	28.8203
208503_s_at	5	7115.4	4423.79	23.3258
202446_s_at	5	8992.18	4307.96	35.2193
218098_at	5	12914	10074.1	12.3537
209579_s_at	5	12251.9	7379.14	24.8217
217772_s_at	5	0.5745	0.3514	24.1001
219097_x_at	5	1.9718	0.6159	52.3989
218078_s_at	5	5287.58	4488.3	8.176
219670_at	6	42.9375	33.4619	12.4027
200065_s_at	6	44092.3	10707.3	60.9221
200623_s_at	6	114346	97234.9	8.0872
200948_at	6	396631	5305.66	97.3599
200964_at	6	1586.06	775.444	34.3263
200966_x_at	6	54966.9	33213.4	24.6694
201247_at	6	155.385	48.2217	52.6326
201322_at	6	79886.6	30100.5	45.2654
201950_x_at	6	1.21154e+06	7843.85	98.7135
202215_s_at	6	17757.5	1075.72	88.5763
203388_at	6	19031.9	1987.46	81.0892
204670_x_at	6	774.654	309.368	42.9222
208190_s_at	6	1326263	19445.9	97.1099
209431_s_at	6	290042	35977.7	77.9292
210012_s_at	6	1777.62	597.314	49.6984
211941_s_at	6	71951.6	5570.99	85.6274
212032_s_at	6	573788	59449.9	81.2235
213977_s_at	6	82561.6	2078.37	95.0889
214687_x_at	6	47101.8	7286.2	73.2066
215714_s_at	6	43652.3	7706.24	69.9904
217949_s_at	6	530554	11692.1	95.6875
218112_at	6	14072.6	4978.76	47.7332
218530_at	6	365.169	107.819	54.4094
220099_s_at	6	28357.5	3401.6	78.5787
200622_x_at	6	28456.3	7597.75	57.8536
201113_at	6	10817388	14630.4	99.7299
201248_s_at	6	634973	6592.85	97.9448
201818_at	6	2.54421e+06	6371.98	99.5004
201900_s_at	6	11729.9	619.798	89.9626
202096_s_at	6	4309789	67540.5	96.9141
202329_at	6	10827.6	2700.28	60.0783
202860_at	6	48187.7	7200.8	73.999
202973_x_at	6	12272	3935.53	51.4359
203442_x_at	6	3173.5	450.83	75.122
204921_at	6	88620.5	8849.17	81.8422
207986_x_at	6	1152.43	228.948	66.8522
209729_at	6	47626.5	1384.71	94.3494
212081_x_at	6	77579	20374.2	58.4001
214080_x_at	6	169260	5928.32	93.232
214721_x_at	6	451969	5370.18	97.6516
214784_x_at	6	698.689	136.709	67.2709
217748_at	6	258172	23474.3	83.3306
217860_at	6	16299.9	8850.42	29.6197
218477_at	6	3691.03	1087.21	54.4934
36994_at	6	19117380	19445.4	99.7968
201771_at	6	614013	1767.58	99.4259
202492_at	6	514.706	42.5018	84.7447
202841_x_at	6	599531	5141.99	98.2992
203175_at	6	353601	29320.9	84.6857
203524_s_at	6	940707	2113.17	99.5517
211512_s_at	6	160.712	83.4081	31.6662
214780_s_at	6	2273.26	479.086	65.1871
215364_s_at	6	205.519	119.216	26.5764
215833_s_at	6	12336	1909.64	73.1899
217047_s_at	6	4233.97	848.832	66.5998
219287_at	6	15510.4	5910.06	44.8187
32836_at	6	476372	20730	91.6597
91617_at	6	2090	249.631	78.6607
200954_at	6	222009	4586.85	95.9515
203259_s_at	6	796814	24873.2	93.9458
204073_s_at	6	145.41	58.8081	42.4065
207081_s_at	6	4910.58	738.953	73.8402
218509_at	6	28265.8	6778.38	61.3152
218650_at	6	691413	4895.58	98.5938
221971_x_at	6	1871635	22228.8	97.6525
AFFX-BioB-3_at	6	23642.2	4291.51	69.2736
202249_s_at	6	1484.74	108.267	86.4072
214763_at	6	3439.71	1236.43	47.1176
218505_at	6	268386	3181.26	97.6571
208750_s_at	6	411766	4821.55	97.6852
210417_s_at	6	123178	10501.8	84.2882
212165_at	6	106231	18674.8	70.0979
212520_s_at	6	23374.5	13478.7	26.852
219382_at	6	889.492	604.179	19.1015
220299_at	6	19894.3	1038.9	90.0742
202261_at	6	62327.7	6403.84	81.3657
203674_at	6	54153.1	2805.97	90.1474
210443_x_at	6	4608.41	509.794	80.0792
218074_at	6	8824.49	2782.08	52.0603
219573_at	6	80243.3	5381.37	87.4303
221335_x_at	6	50080.4	4628.83	83.0785
200990_at	6	288422	20694.5	86.6105
201819_at	6	458159	9448.69	95.9587
208163_s_at	6	826008	4569.01	98.8998
208610_s_at	6	3944.28	33.4044	98.3204
212056_at	6	1.00777e+06	926.062	99.8164
212880_at	6	81970.8	671.942	98.3739
218157_x_at	6	9134648	1947.99	99.9574
218597_s_at	6	19146	407.544	95.8315
220773_s_at	6	44453	24756.6	28.4592
221527_s_at	6	78485.5	6278.42	85.1861
208952_s_at	6	3222650	452.825	99.9719
209381_x_at	6	515907	61.4292	99.9762
212252_at	6	11571.2	846.262	86.3698
212576_at	6	348865	1211.23	99.308
220587_s_at	6	336078	599.769	99.6437
202624_s_at	6	4962429	2629.6	99.8941
204650_s_at	6	2324.67	21.8771	98.1354
209413_at	6	311221	6889.91	95.6682
210100_s_at	6	741176	480.656	99.8704
210230_at	6	360358	365.613	99.7973
211716_x_at	6	25582.8	279.128	97.8414
212063_at	6	953.774	58.5259	88.4371
213005_s_at	6	116.079	43.6261	45.3668
213642_at	6	77569.4	366.369	99.0598
221794_at	6	117687	9462.68	85.1157
201724_s_at	6	100977	2642.74	94.8992
204908_s_at	6	765.43	540.34	17.2381
396_f_at	6	9.1305	0.3984	91.638
203076_s_at	6	819882	56452.6	87.1162
221725_at	6	8.28557e+06	1561.69	99.9623
48659_at	6	376808	816.523	99.5676
214001_x_at	6	29228.4	246.7	98.3261
217839_at	6	246.87	35.717	74.7214
221654_s_at	6	1471.23	603.22	41.8429
203201_at	6	7157.63	2796.19	43.8168
201864_at	6	28295.6	3418.29	78.443
212176_at	6	1643.47	557.909	49.3127
212574_x_at	6	3195.8	23.3082	98.5519
34478_at	6	13366.7	4.2171	99.9369
207305_s_at	6	32160.2	3642.56	79.6521
202786_at	6	57352.1	4061.32	86.7738
35265_at	6	138.853	46.5238	49.8064
201219_at	6	11862.1	70.7899	98.8135
201640_x_at	6	23.5456	4.3072	69.0716
201722_s_at	6	6091.36	39.072	98.7253
216488_s_at	6	2.0583e+06	1422.6	99.8619
218424_s_at	6	7592.01	177.972	95.419
209164_s_at	6	253654	2825.67	97.7966
221551_x_at	6	162028	189.176	99.7668
201796_s_at	6	430.299	26.9293	88.2206
203783_x_at	6	19895.2	550.025	94.6195
203794_at	6	8052.08	777.755	82.3835
206288_at	6	140.672	8.5273	88.5693
208953_at	6	146299	11937.2	84.9122
210243_s_at	6	2208.45	492.671	63.5209
210671_x_at	6	3741.81	287.461	85.7314
210974_s_at	6	137.42	30.5898	63.5858
212680_x_at	6	442839	4467.27	98.0026
213025_at	6	752.118	19.9058	94.8432
218114_at	6	1.52548e+06	2718.9	99.6442
221871_s_at	6	268.284	9.7714	92.9716
201473_at	6	6843176	460.679	99.9865
201698_s_at	6	1.66053e+06	13625.8	98.3722
201868_s_at	6	67346.3	108.012	99.6797
205367_at	6	859.887	175.892	66.0368
207686_s_at	6	567.583	25.7222	91.3292
209127_s_at	6	373283	5138.26	97.2844
209342_s_at	6	105.531	6.8948	87.7345
215171_s_at	6	3087.83	409.312	76.5916
221851_at	6	1.12976e+06	7789.17	98.6305
210120_s_at	6	83461.9	139.435	99.6664
213729_at	6	107.521	37.5877	48.1937
213756_s_at	6	254098	133.758	99.8948
217724_at	6	9307575	2231.52	99.9521
219168_s_at	6	11593.9	131.055	97.7645
64474_g_at	6	2548.59	532.04	65.459
202773_s_at	6	15351.1	329.163	95.8016
203216_s_at	6	399090	245.842	99.8769
207966_s_at	6	113034	85.2311	99.8493
206722_s_at	6	39440.8	1376.48	93.2554
211899_s_at	6	253017	478.679	99.6223
213490_s_at	6	6.11397e+06	42169.1	98.63
213445_at	6	277891	92841.4	49.9146
213081_at	6	18190.3	77.7525	99.1488
209558_s_at	6	2.47981e+06	66159	94.8029
218171_at	6	16.7252	2.4809	74.1652
205353_s_at	6	977860	26466.1	94.7296
214881_s_at	6	58990.4	1581.9	94.7768
202356_s_at	6	65684.9	2007.65	94.0683
209163_at	6	158127	11211.1	86.7589
205035_at	6	126526	3771.65	94.2107
212369_at	6	3.09409e+06	3729.24	99.7592
218606_at	6	27160.9	1161.3	91.7994
202104_s_at	6	32.6369	11.1399	49.1058
202320_at	6	12120.6	3151.95	58.7239
203582_s_at	6	1.36102e+06	121223	83.6433
207939_x_at	6	50281.7	7127.29	75.1701
208685_x_at	6	14631701	11805	99.8388
204678_s_at	6	23442.2	1128.31	90.8157
206295_at	6	65506.2	1095.96	96.7089
213244_at	6	3.12928e+06	67387.4	95.7839
201512_s_at	6	57125.1	1684.94	94.2699
209294_x_at	6	8826.78	171.462	96.189
215450_at	6	12468326	22420.8	99.641
209529_at	6	6.91776e+06	1.22061e+06	70.0036
201644_at	6	269649	619.179	99.5418
218924_s_at	6	1070.84	185.142	70.5185
221688_s_at	6	16131.4	763.121	90.9661
202077_at	6	56490.2	4124.32	86.3916
207435_s_at	6	3142027	15617.9	99.0108
213664_at	6	27613.7	2983.37	80.499
203233_at	6	945.791	112.824	78.6846
200778_s_at	6	1.04108e+06	6376.7	98.7824
200707_at	6	2089.39	1624.2	12.5265
213179_at	6	27427.5	2278.33	84.6607
64899_at	6	1215.49	207.702	70.8117
215954_s_at	6	7456.22	417.176	89.4029
218906_x_at	6	782.857	104.678	76.4115
221920_s_at	6	14222.3	687.626	90.7762
212759_s_at	6	389151	4477.5	97.725
213471_at	6	215441	88278.8	41.8684
220334_at	6	73991.9	3619.03	90.6739
37462_i_at	6	14290304	2.53952e+06	69.8212
202464_s_at	6	425.895	42.794	81.7388
204679_at	6	70349	5681.1	85.0556
214395_x_at	6	559.509	161.267	55.2519
210541_s_at	6	41881.4	1591.4	92.6787
210695_s_at	6	172.817	108.195	22.9963
205025_at	6	544984	58971.6	80.4716
216511_s_at	6	498783	9932.9	96.0949
200044_at	6	257148	6963.54	94.7268
207425_s_at	6	112	5.4545	90.7121
216035_x_at	6	9536407	83026	98.2738
222155_s_at	6	438129	4172.82	98.1131
212762_s_at	6	330724	14854.3	91.4032
217725_x_at	6	162528	16014.6	82.0608
221432_s_at	6	999739	12805.5	97.4706
200630_x_at	6	614346	106579	70.4326
209397_at	6	189372	16926.6	83.5902
203592_s_at	6	32815.6	4516.03	75.8059
202835_at	6	62219.6	3384.77	89.6813
209461_x_at	6	259638	10168.3	92.4625
201885_s_at	6	446986	54631.7	78.2178
212673_at	6	2176829	78119.8	93.0713
216855_s_at	6	159962	16916.3	80.8724
202560_s_at	6	3493034	992887	55.7332
202771_at	6	58294.5	11848.9	66.2152
219654_at	6	668.25	285.933	40.0674
36564_at	6	10172.3	4039.08	43.1572
AFFX-BioDn-3_at	6	46506.4	19564.5	40.7773
211939_x_at	6	10383.4	3446.93	50.1539
200636_s_at	6	97075.2	49409.8	32.5394
202180_s_at	6	41899.9	12447.8	54.1919
200871_s_at	6	106960	44493.2	41.245
221042_s_at	6	47089.3	25169.1	30.3358
212537_x_at	6	54575.8	42013.6	13.0058
218062_x_at	6	20915	10888.1	31.5279
219388_at	6	1220.44	636.614	31.4382
203796_s_at	6	7165.1	2032.57	55.8025
201168_x_at	6	154.956	49.7948	51.3604
207390_s_at	6	196324	32003.3	71.9672
210154_at	6	367.957	100.285	57.1652
211982_x_at	6	60268.1	9281.36	73.3101
212969_x_at	6	140.351	79.1616	27.8753
216037_x_at	6	126496	41133	50.9237
219419_at	6	61022.2	14509.4	61.5806
221517_s_at	6	7316	1708.13	62.143
52940_at	6	3608.16	1491.71	41.5001
202109_at	6	2781.06	2062.23	14.842
204897_at	6	2242.17	1502.06	19.7665
210023_s_at	6	14521.8	5404.48	45.7551
210336_x_at	6	34857.6	26405.8	13.7959
212096_s_at	6	2959.61	2717.25	4.2691
212319_at	6	74025.1	47414.5	21.9126
214315_x_at	6	6276.03	3825.71	24.2564
221273_s_at	6	57207.4	34499.3	24.7617
212103_at	6	120.674	62.8258	31.5249
221939_at	6	145.57	78.9345	29.6813
52005_at	6	144.26	105.637	15.4553
221943_x_at	6	4406.91	4393.03	0.1578
204227_s_at	6	27034.3	21637.9	11.0872
214730_s_at	6	289813	272496	3.0796
200832_s_at	6	4438.07	3077.31	18.1063
219623_at	7	352.525	244.872	18.0203
218705_s_at	7	5.7069	4.683	9.8542
221477_s_at	7	24.2239	1.4229	88.9036
203439_s_at	7	79.2175	7.9769	81.7031
203661_s_at	7	2.8786	0.3514	78.2439
204037_at	7	1600.7	107.891	87.3707
204845_s_at	7	1636.74	0.3514	99.9571
209304_x_at	7	215.648	20.8869	82.3392
213930_at	7	102.265	1.6787	96.77
214595_at	7	73.834	0.3514	99.0528
218445_at	7	22262.8	33.9908	99.6951
221293_s_at	7	1784.81	0.9406	99.8947
204257_at	7	78.868	0.3514	99.1129
204916_at	7	10375.2	2.0967	99.9596
205935_at	7	72.9352	3.0668	91.9296
206687_s_at	7	154.987	0.7068	99.0921
207253_s_at	7	776.516	1.4975	99.615
209859_at	7	92.3307	0.3514	99.2418
213191_at	7	272.802	0.3514	99.7427
215764_x_at	7	2178.59	0.3514	99.9677
218631_at	7	8.1597	0.5663	87.0204
218902_at	7	68.1538	0.3514	98.9742
220992_s_at	7	5115.87	0.3514	99.9863
222041_at	7	77.2919	0.3514	99.0949
37425_g_at	7	51690.3	15.0236	99.9419
211289_x_at	7	24912.9	1.5879	99.9873
219534_x_at	7	13135.1	12.955	99.8029
220050_at	7	5337.77	0.3514	99.9868
203468_at	7	7802.87	1.4339	99.9633
203604_at	7	21.4714	1.5889	86.2196
207571_x_at	7	1056.85	1.6631	99.6858
207850_at	7	80.889	0.3514	99.135
44702_at	7	1100.58	1.4375	99.7391
201389_at	7	38577.8	242.996	98.7481
210315_at	7	10145.5	0.3514	99.9931
211208_s_at	7	475.352	2.253	99.0566
216894_x_at	7	1600.75	0.6105	99.9238
213040_s_at	7	506.963	0.5462	99.7848
221710_x_at	7	6245.33	0.5753	99.9816
219495_s_at	7	3.3559	0.3514	81.045
202791_s_at	7	1574.73	1.0273	99.8696
205877_s_at	7	572.686	0.3514	99.8774
214092_x_at	7	3269.49	1.0244	99.9374
202311_s_at	7	998.215	0.3514	99.9296
218629_at	7	793.132	0.3514	99.9114
212212_s_at	7	6.2522	0.3514	89.3584
222219_s_at	7	43.5347	0.3514	98.3988
222191_s_at	7	31.0955	0.869	94.5629
204440_at	7	1567.43	10.5993	98.6566
201747_s_at	7	1718.5	15.455	98.2174
203677_s_at	7	13.8092	0.3514	95.0375
219801_at	7	27.029	0.3514	97.4335
204974_at	7	692.762	0.3514	99.8986
218939_at	7	15.7774	0.3514	95.643
203901_at	7	4522.53	0.3514	99.9845
220134_x_at	7	168.843	0.3514	99.5847
213653_at	7	1.6714	0.3514	65.2596
202991_at	7	3.1327	0.3514	79.8303
218985_at	7	0.7237	0.3514	34.6326
202614_at	7	57.3502	40.5403	17.1722
204730_at	7	49.1864	3.4323	86.9542
41660_at	7	83.2564	46.3899	28.4362
204811_s_at	7	1759.69	0.3514	99.9601
216547_at	7	9.5235	0.3514	92.8838
211979_at	7	6.5633	0.3514	89.8372
216044_x_at	7	16.4744	0.3514	95.8235
204792_s_at	7	58.4244	0.3514	98.8044
206906_at	7	8.433	0.3514	92.0003
210435_at	7	67.9675	0.3514	98.9714
204966_at	7	1136.08	0.3514	99.9382
219324_at	7	82.1859	0.3514	99.1486
210811_s_at	7	260.71	0.3514	99.7308
49679_s_at	7	411.985	0.3514	99.8296
208141_s_at	7	2635.26	1.9746	99.8502
214674_at	7	11928.6	2.8933	99.9515
203940_s_at	7	162356	1608.16	98.0384
205481_at	7	75.742	0.3514	99.0765
216325_x_at	7	2036.03	16.6372	98.379
213204_at	7	5718	1.3817	99.9517
219923_at	7	24409	4.7558	99.961
219503_s_at	7	7276.72	0.8321	99.9771
210785_s_at	7	27.5327	1.2448	91.3486
213182_x_at	7	54.456	4.281	85.4233
203589_s_at	7	29.0174	0.3514	97.6073
219216_at	7	7.3069	0.3514	90.824
206847_s_at	7	146.34	0.3514	99.521
221997_s_at	7	22.2938	0.3514	96.8968
203685_at	7	30.3965	0.3514	97.7146
205586_x_at	7	120.179	0.5774	99.0437
209577_at	7	6.9903	0.3514	90.4279
203879_at	7	7360.12	47.2379	98.7246
205652_s_at	7	2.7413	0.3514	77.2775
213558_at	7	426.425	0.3514	99.8353
217497_at	7	861.785	0.3514	99.9185
220144_s_at	7	46.4885	0.3514	98.4997
201210_at	7	2380.44	64.8966	94.6922
202653_s_at	7	864.487	1.745	99.5971
202755_s_at	7	2557.81	0.3514	99.9725
203481_at	7	2705.2	9.5959	99.2931
213452_at	7	102.102	2.7469	94.7603
213965_s_at	7	7333.91	4.5581	99.8758
204381_at	7	12490.3	732.34	88.923
205966_at	7	13.5515	0.3514	94.9455
215159_s_at	7	3080.23	13.4746	99.1289
215193_x_at	7	5685.5	21.8366	99.2348
220967_s_at	7	60891.8	8.9137	99.9707
205087_at	7	41318	33.6399	99.8373
212262_at	7	99.337	2.6913	94.7244
220685_at	7	35.8864	0.3514	98.0608
202577_s_at	7	3877.5	31.576	98.3845
221206_at	7	59353.6	360.892	98.7913
204300_at	7	10.2551	0.3514	93.3746
212430_at	7	2039.88	5.3593	99.4759
206092_x_at	7	341.084	0.3514	99.7942
208165_s_at	7	14.4629	0.3514	95.2565
217052_x_at	7	1516.87	2.4497	99.6775
220893_at	7	409.349	5.3705	97.4101
204380_s_at	7	456.186	4.9985	97.8323
209818_s_at	7	328.651	0.3514	99.7864
212261_at	7	23.1295	0.4228	96.4095
213622_at	7	61.2173	0.4158	98.6508
213829_x_at	7	14992	13.3201	99.8225
214314_s_at	7	43.8296	1.3594	93.9834
220993_s_at	7	82.7213	1.8913	95.5296
221185_s_at	7	252.923	0.3514	99.7225
221825_at	7	28.9379	0.9355	93.7371
208216_at	7	765.06	6.5234	98.3091
215569_at	7	78.6683	0.3514	99.1107
217191_x_at	7	4.292	0.3514	84.8663
219515_at	7	2.8843	0.3514	78.2821
220663_at	7	6.8602	0.3514	90.2556
220961_s_at	7	10.4132	0.3514	93.4719
203891_s_at	7	8803.89	1685.47	67.8633
212785_s_at	7	531.441	0.3514	99.8679
213882_at	7	3.334	0.3514	80.9322
215308_at	7	3.9682	0.3514	83.7317
215622_x_at	7	170.26	0.3841	99.5498
218348_s_at	7	532.798	4.4683	98.3367
219185_at	7	54.9426	0.6002	97.8388
61732_r_at	7	421.49	1.007	99.5233
203278_s_at	7	22988.8	407.144	96.5195
204425_at	7	36494.7	389.876	97.886
205092_x_at	7	5.6037	0.3514	88.1996
205876_at	7	5.8449	0.3516	88.6516
207277_at	7	125.925	1.8898	97.0429
207941_s_at	7	4288.32	9.8912	99.5398
213290_at	7	4.4421	0.3514	85.3401
220760_x_at	7	56.2676	2.175	92.5568
203651_at	7	397.926	0.3514	99.8236
206896_s_at	7	18306.8	52.1165	99.4322
207031_at	7	4.9301	0.3514	86.6946
208315_x_at	7	83.4134	0.3514	99.1611
217538_at	7	4.3223	0.3514	84.9642
217556_at	7	1.6881	0.3514	65.5431
221566_s_at	7	633.318	5.319	98.3343
202087_s_at	7	966.346	10.021	97.9473
202641_at	7	2.3101	0.3514	73.5964
205145_s_at	7	13.2769	0.3514	94.8436
206182_at	7	1978.9	65.0321	93.6366
215501_s_at	7	8912.61	1.487	99.9666
204894_s_at	7	273.066	33.2716	78.2778
205620_at	7	4.1601	0.3514	84.4236
207630_s_at	7	1.3486	0.3514	58.6635
214220_s_at	7	278.754	0.9393	99.3283
215730_at	7	19.8958	2.0506	81.313
218004_at	7	6.7233	0.3514	90.0671
219112_at	7	4.2128	0.3514	84.6036
219484_at	7	13.4265	0.3514	94.8996
221924_at	7	1330.35	2.8286	99.5757
213480_at	7	48.8161	0.4061	98.3499
219055_at	7	1.2527	0.3514	56.1922
211348_s_at	7	8495.15	366.935	91.719
212731_at	7	191.43	19.3822	81.6119
218021_at	7	766.403	11.3814	97.0734
220672_at	7	644.154	4.4881	98.6162
205298_s_at	7	2357.89	15.7091	98.6763
208184_s_at	7	5212.52	648.717	77.8642
212398_at	7	35.9013	0.3514	98.0616
212824_at	7	1157.71	11.9267	97.9606
204077_x_at	7	666.226	0.6336	99.81
213681_at	7	2.4839	0.3514	75.2146
204788_s_at	7	9.3335	0.3514	92.7441
220288_at	7	590.315	10.454	96.5198
213288_at	7	1891.66	393.241	65.5791
203921_at	7	155.947	0.8067	98.9708
205616_at	7	7.4913	0.3514	91.0398
216580_at	7	554.133	2.1439	99.2292
216907_x_at	7	9.1868	0.3514	92.6326
209390_at	7	8.9707	0.3514	92.4617
213900_at	7	2.9827	0.3514	78.9227
65588_at	7	2.3214	0.3514	73.7081
213773_x_at	7	5.9323	0.6648	79.8443
210187_at	7	4.8484	0.3514	86.4855
209483_s_at	7	131.776	1.513	97.7298
213353_at	7	3702.19	36.9194	98.0252
222262_s_at	7	3.9596	0.7043	69.797
208174_x_at	7	807.349	0.3514	99.913
37586_at	7	1.8629	0.3514	68.2638
201824_at	7	277.509	2.2849	98.3667
218694_at	7	452.842	24.9115	89.5714
219325_s_at	7	47.5844	3.4966	86.3097
204136_at	7	1001.71	8.1472	98.3865
205072_s_at	7	1.1858	0.3514	54.2834
216895_at	7	2.8776	0.3718	77.1141
207992_s_at	7	6.4523	0.3514	89.6714
208064_s_at	7	2174.98	176.84	84.9614
218637_at	7	44.8253	2.9318	87.7219
213000_at	7	113.334	3.6615	93.7408
211696_x_at	7	26.6329	0.7483	94.5345
213270_at	7	42.6107	0.958	95.6022
219720_s_at	7	13.0142	0.426	93.6605
218153_at	7	296.269	14.3542	90.7578
218470_at	7	273.432	8.6689	93.8541
221621_at	7	4.0646	0.3514	84.0868
222310_at	7	129.842	3.7496	94.3865
201294_s_at	7	2.0414	0.3514	70.6313
206339_at	7	0.5254	0.3514	19.8469
207953_at	7	149.58	5.4523	92.9662
209588_at	7	3.0501	0.3514	79.3409
222149_x_at	7	49.3941	0.6932	97.2321
58994_at	7	840.757	114.856	75.9619
218551_at	7	0.8043	0.3514	39.1933
217390_x_at	7	2.4899	0.3514	75.2671
216177_at	7	0.7187	0.3514	34.331
209617_s_at	7	3.2825	0.7579	62.4823
[truncated: 12,872 more rows]
