# Supplementary material for: Identification of Y-Box Binding Protein 1 As a Core Regulator of MEK/ERK Pathway-Dependent Gene Signatures in Colorectal Cancer Cells
Source: PLoS Genet. 2010 Dec 2;6(12):e1001231. doi: 10.1371/journal.pgen.1001231 (PMC2996331; doi:10.1371/journal.pgen.1001231)
Supplement: Table S5 — Prediction of transcription factor binding sites. The procedure for identifying transcription factor binding sites in the regulatory sequences of MEK/ERK pathway-regulated genes is described in Materials and Methods. Columns indicate probe set-IDs, gene symbols, the number of the cluster of co-expressed genes and the predicted binding sites for NFY, E2F and HOX4A (marked by ***). (1.88 MB XLS) [file pgen.1001231.s010.xls]

## Sheet: Tabelle1
Probe Set ID	Gene Symbol	Cluster	NFY_01	E2F1_Q4_01	E2F_Q3_01	E2F_Q4_01	HOXA4_Q2
211710_x_at	RPL4
211952_at	KPNB3
211764_s_at	UBE2D1		***
201908_at	DVL3						***
201919_at	FLJ10618		***	***			***
211733_x_at	SCP2						***
201922_at	TINP1			***	***	***
211797_s_at	NFYC
211715_s_at	BDH
211833_s_at	BAX		***
211697_x_at	LOC56902			***	***	***	***
211678_s_at	MEG3
201937_s_at	DNPEP						***
211615_s_at	LRPPRC						***
201948_at	HUMAUANTIG		***
211574_s_at	MCP		***
211717_at	MGC15396						***
201876_at	PON2
211114_x_at	SIP1
211946_s_at	XTP2						***
201872_s_at	ABCE1
211943_x_at	TPT1						***
201873_s_at	ABCE1
201875_s_at	FLJ21047
211765_x_at	PPIA
211936_at	HSPA5		***				***
211561_x_at	---
201880_at	ARIH1
201881_s_at	ARIH1
201886_at	WDR23
211927_x_at	---
211924_s_at	PLAUR						***
201894_s_at	DCN
211938_at	EIF4B						***
202019_s_at	LANCL1		***	***	***	***
211300_s_at	TP53		***	***	***	***
211296_x_at	UBC			***	***
211295_x_at	CYP2A6
202013_s_at	EXT2
211257_x_at	NP220
211252_x_at	PTCRA						***
211569_s_at	HADHSC		***				***
211241_at	---
211345_x_at	---
211177_s_at	TXNRD2
202020_s_at	LANCL1		***	***	***	***
202024_at	ASNA1
211150_s_at	---
211137_s_at	ATP2C1		***
212248_at	LYRIC			***	***	***
211251_x_at	NFYC
201980_s_at	RSU1		***				***
211960_s_at	RAB7
201959_s_at	PAM
211552_s_at	ALDH4A1		***
201964_at	KIAA0625		***	***	***	***
201965_s_at	KIAA0625		***	***	***	***
211530_x_at	HLA-G
211325_x_at	LOC283345
211501_s_at	EIF3S9
211328_x_at	HFE		***
201983_s_at	EGFR
211445_x_at	FKSG17						***
201987_at	TRAP240		***
211423_s_at	SC5DL		***	***	***	***
211378_x_at	---
201998_at	SIAT1
211563_s_at	C19orf2
211503_s_at	RAB14
212127_at	RANGAP1						***
211949_s_at	NOLC1			***	***	***	***
201749_at	---
212144_at	UNC84B		***
212140_at	KIAA0648
201758_at	TSG101
201761_at	MTHFD2		***
201746_at	TP53		***	***	***	***
212128_s_at	DAG1		***
212178_s_at	POM121		***				***
212126_at	---
212112_s_at	STX12
212110_at	SLC39A14
212109_at	C16orf34			***	***
201773_at	ADNP
201777_s_at	KIAA0494		***
212129_at	NIPA2						***
212208_at	KIAA1025
213730_x_at	TCF3			***	***
212244_at	GRINL1A
201693_s_at	EGR1
201694_s_at	EGR1
212232_at	FNBP4		***		***
201701_s_at	PGRMC2		***
212164_at	C1orf37		***
212213_x_at	OPA1
212073_at	CSNK2A1
212200_at	KIAA0692			***	***	***	***
212199_at	MGC9651
201728_s_at	KIAA0100
201730_s_at	TPR
201734_at	CLCN3		***
201735_s_at	CLCN3		***
201715_s_at	ACINUS
211978_x_at	PPIA
201837_s_at	STAF65(gamma)
201839_s_at	TACSTD1						***
212007_at	UBXD2		***				***
211996_s_at	MGC70907
211995_x_at	ACTG1
211987_at	TOP2B		***		***
212089_at	LMNA
211983_x_at	ACTG1
212025_s_at	FLII				***		***
211977_at	---
211976_at	---
211971_s_at	LRPPRC						***
211970_x_at	ACTG1
201856_s_at	ZFR
211965_at	ZFP36L1
201846_s_at	RYBP		***
212046_x_at	MAPK3
202025_x_at	ACAA1
212069_s_at	MGC10526
212066_s_at	USP34
201807_at	VPS26						***
212059_s_at	TRPC4AP						***
201813_s_at	TBC1D5
201835_s_at	PRKAB1			***	***
212047_s_at	DKFZP566H073
201832_s_at	VDP
212037_at	PNN		***			***	***
212036_s_at	PNN		***			***	***
212033_at	RNPC7
212031_at	RNPC7
201821_s_at	TIMM17A		***				***
212028_at	RNPC7
212075_s_at	CSNK2A1
212048_s_at	KIAA1522
202245_at	LSS		***
202173_s_at	ZNF161			***	***	***
210111_s_at	KIAA0265		***
202216_x_at	NFYC
210076_x_at	PAI-RBP1
202224_at	---
210027_s_at	APEX1			***	***
202212_at	PES1
210006_at	DKFZP564O243
210150_s_at	LAMA5			***	***
209945_s_at	GSK3B		***
202255_s_at	SIPA1L1
209935_at	ATP2C1		***
202257_s_at	CD2BP2
202259_s_at	CG005		***
209907_s_at	ITSN2
202239_at	ADPRTL1
202183_s_at	KIF22		***				***
211115_x_at	SIP1
210312_s_at	LOC90410		***
210283_x_at	PAIP1			***	***	***
210275_s_at	ZNF216
210266_s_at	TRIM33
202182_at	GCN5L2
210130_s_at	TM7SF2		***
210250_x_at	ADSL						***
202264_s_at	TOMM40		***				***
210220_at	FZD2		***				***
210213_s_at	ITGB4BP						***
210212_x_at	MTCP1		***
202194_at	CGI-100			***	***	***
210200_at	WWP2
210186_s_at	FKBP1A		***	***	***
210252_s_at	MADD						***
202322_s_at	GGPS1
209746_s_at	COQ7						***
209736_at	SOX13						***
209717_at	EVI5						***
202317_s_at	UBE4B
202318_s_at	SUSP1		***				***
209707_at	PIGK
202262_x_at	DDAH2
209702_at	FTO
209786_at	HMGN4		***
202324_s_at	ACBD3						***
202330_s_at	UNG			***	***	***	***
209668_x_at	CES2		***
202334_s_at	UBE2B
209654_at	KIAA0947
209643_s_at	PLD2
209705_at	M96
209836_x_at	---
202171_at	ZNF161			***	***	***
209885_at	ARHD
209873_s_at	PKP3
209868_s_at	RBMS1
202277_at	SPTLC1		***				***
202278_s_at	SPTLC1		***				***
209765_at	ADAM19
209853_s_at	PSME3		***
202304_at	KIAA0970
209820_s_at	TBL3			***	***	***	***
209817_at	PPP3CB
209808_x_at	ING1
209805_at	PMS2		***		***	***	***
202300_at	HBXIP						***
202302_s_at	FLJ11021
202263_at	CYB5R1					***	***
209860_s_at	ANXA7		***
210849_s_at	VPS41
210334_x_at	BIRC5						***
202069_s_at	IDH3A					***
202071_at	SDC4
210935_s_at	WDR1			***	***	***
202076_at	BIRC2						***
210892_s_at	GTF2I
210951_x_at	RAB27A
202093_s_at	PD2		***			***	***
210959_s_at	SRD5A1			***	***	***
210830_s_at	PON2
210817_s_at	NDP52						***
202102_s_at	BRD4						***
210775_x_at	CASP9
210774_s_at	NCOA4						***
210768_x_at	LOC54499			***	***		***
210879_s_at	GAF1			***	***	***
202045_s_at	GRLF1						***
211090_s_at	---
211063_s_at	NCK1					***	***
211061_s_at	MGAT2		***	***	***	***	***
202038_at	UBE4A
211056_s_at	SRD5A1			***	***	***
211048_s_at	ERP70		***	***	***	***
202068_s_at	LDLR						***
202042_at	HARS
210734_x_at	MAX
202049_s_at	ZNF262		***
211023_at	PDHB		***				***
210993_s_at	MADH1						***
210976_s_at	PFKM						***
210970_s_at	IBTK		***
202067_s_at	LDLR						***
211042_x_at	---
210427_x_at	ANXA2
202133_at	TAZ						***
202134_s_at	TAZ						***
202137_s_at	BS69			***	***	***
210524_x_at	MT1F						***
210502_s_at	PPIE						***
202142_at	COP9
210764_s_at	CYR61
210453_x_at	ATP5L				***	***	***
210570_x_at	MAPK9
202167_s_at	MMS19L
210389_x_at	TUBD1
202169_s_at	AASDHPPT		***
210378_s_at	SSNA1			***	***	***
202170_s_at	AASDHPPT		***
210371_s_at	RBBP4				***
202155_s_at	NUP214		***				***
210638_s_at	FBXO9			***	***	***
212255_s_at	ATP2C1		***
202114_at	SNX2
202116_at	DPF2						***
210681_s_at	USP15
210658_s_at	GGA2
210651_s_at	EPHB2					***
210561_s_at	WSB1			***	***
202127_at	PRPF4B		***	***	***	***	***
202132_at	TAZ						***
210627_s_at	GCS1						***
202128_at	KIAA0317
210609_s_at	TP53I3						***
210596_at	DKFZp564K142
210594_x_at	MPZL1
210573_s_at	RPC62
210740_s_at	ITPK1
210647_x_at	PLA2G6		***		***	***	***
201310_s_at	C5orf13			***	***	***
213266_at	76P
213165_at	CAP350		***
213161_at	---
213151_s_at	CDC10
201304_at	NDUFA5
213140_s_at	SS18L1
213180_s_at	GOSR2
201307_at	FLJ10849		***		***	***
213185_at	KIAA0556
213112_s_at	SQSTM1
201313_at	ENO2						***
201316_at	PSMA2
213105_s_at	MGC24381
213104_at	MGC24381
213102_at	ACTR3
213128_s_at	UBE3A						***
213215_at	---
212900_at	SEC24A
201273_s_at	SRP9
213251_at	SMARCA5		***
201281_at	ADRM1
213242_x_at	KIAA0284
213233_s_at	KIAA1354
213168_at	SP3
213221_s_at	SIK2
213092_x_at	KIAA0974			***	***	***	***
213214_x_at	ACTG1
201289_at	CYR61
201293_x_at	PPIA
213190_at	COG7					***	***
213187_x_at	FTL		***
201299_s_at	C2orf6						***
213230_at	HUMPPA		***				***
212946_at	KIAA0564
212988_x_at	ACTG1
201349_at	SLC9A3R1		***				***
201354_s_at	BAZ2A			***	***	***
212971_at	CARS						***
201362_at	IVNS1ABP
201363_s_at	IVNS1ABP
213101_s_at	ACTR3
201364_s_at	OAZ2						***
201343_at	UBE2D2						***
201366_at	ANXA7		***
201371_s_at	CUL3		***				***
212931_at	TCF20						***
212923_s_at	C6orf145
212910_at	THAP11
212246_at	MCFD2		***				***
212959_s_at	MGC4170
213074_at	IRAK1BP1
213272_s_at	LOC57146			***	***	***
201319_at	MRCL3
213086_s_at	---
213084_x_at	RPL23A
213083_at	SLC35D2
201320_at	MYL6		***
212997_s_at	TLK2						***
213076_at	ITPKC
213015_at	BBX		***				***
201334_s_at	ARHGEF12
201336_at	VAMP3		***
213034_at	KIAA0999
213028_at	---
213020_at	GOSR1						***
213019_at	RANBP6
213093_at	PRKCA
213077_at	FLJ21940
201179_s_at	GNAI3
201270_x_at	KIAA1068
213604_at	TCEB3
201167_x_at	ARHGDIA				***
201170_s_at	BHLHB2
213594_x_at	FUSIP1
213588_x_at	RPL14						***
213608_s_at	TFIP11				***
213583_x_at	EEF1A1
213612_x_at	LOC149013
213572_s_at	SERPINB1
213571_s_at	EIF4EL3
213564_x_at	LDHB						***
213557_at	---
213538_at	SON		***	***	***	***
201195_s_at	SLC7A5
213587_s_at	C7orf32
213654_at	TAF5L		***
213708_s_at	HUMGT198A		***
213701_at	DKFZp434N2030
213700_s_at	PKM2		***
213687_s_at	RPL35A
213682_at	NUP50
213677_s_at	PMS1			***	***	***
213607_x_at	---
201160_s_at	CSDA
213491_x_at	RPN2		***				***
213646_x_at	K-ALPHA-1
201164_s_at	PUM1						***
213637_at	---
201165_s_at	PUM1						***
213626_at	FLJ14431
213614_x_at	---
213671_s_at	MARS						***
201254_x_at	RPS6
213356_x_at	HNRPA1		***	***	***	***
213352_at	KIAA0779
213351_s_at	KIAA0779
201246_s_at	OTUB1
213349_at	KIAA0779
213347_x_at	RPS4X
213514_s_at	DIAPH1		***				***
201252_at	PSMC4		***
213374_x_at	HIBCH
213302_at	PFAS						***
213300_at	KIAA0404
201258_at	RPS16			***	***	***
213294_at	FLJ38348
213292_s_at	SNX13		***			***	***
213291_s_at	UBE3A						***
213333_at	MDH2						***
201228_s_at	ARIH2				***	***	***
212898_at	KIAA0406
213477_x_at	EEF1A1
201212_at	LGMN		***
213453_x_at	GAPD						***
213440_at	KIAA0582
213434_at	EPIM
201244_s_at	RAF1						***
213409_s_at	RHEB		***	***	***	***
213367_at	---
201230_s_at	ARIH2				***	***	***
213399_x_at	RPN2		***				***
213396_s_at	AKAP10			***	***	***
213390_at	C19orf7						***
213379_at	CL640		***				***
213376_at	ZBTB1
213513_x_at	ARPC2
213414_s_at	RPS19
212446_s_at	LOC253782
201500_s_at	PPP1R11
201568_at	QP-C
201570_at	CGI-51		***
201573_s_at	ETF1		***
212479_s_at	FLJ13910		***
212462_at	MYST4
212533_at	WEE1			***	***	***
212455_at	YT521						***
212534_at	ZNF24
201596_x_at	KRT18
212439_at	GMPPB		***		***	***
201603_at	PPP1R12A		***
212435_at	---
212434_at	GRPEL1		***	***	***
201613_s_at	RUVBL1		***
201590_x_at	ANXA2
201527_at	ATP6V1F			***	***	***	***
212907_at	SLC30A1		***
212605_s_at	---
212601_at	KIAA0399
212591_at	---
201522_x_at	SNRPN
212581_x_at	GAPD						***
212515_s_at	DDX3X
212578_x_at	---
212416_at	SCAMP1						***
212569_at	KIAA0650
201528_at	RPA1				***	***
212567_s_at	MAP4		***				***
201529_s_at	RPA1				***	***
212542_s_at	PHIP
201550_x_at	ACTG1
212579_at	KIAA0650
212298_at	NRP1
212322_at	SGPL1						***
212321_at	SGPL1						***
212315_s_at	NUP210
212314_at	KIAA0746
212305_s_at	FLJ39207
201658_at	ARL1						***
212429_s_at	GTF3C2						***
212300_at	DKFZp451J0118
212340_at	MGC21416						***
201660_at	FACL3		***
212295_s_at	SLC7A1
212284_x_at	TPT1						***
201677_at	DC12
201679_at	ARS2						***
212276_at	LPIN1
201659_s_at	ARL1						***
201632_at	EIF2B1
201494_at	PRCP			***	***	***
212412_at	LIM
212407_at	CGI-01		***				***
201626_at	INSIG1
201628_s_at	RRAGA						***
212383_at	ATP6V0A1		***				***
212329_at	SCAP						***
212376_s_at	EP400						***
212331_at	RBL2			***	***		***
212370_x_at	FLJ10824
212368_at	ZNF292
212367_at	FEM1B
212364_at	MYO1B
212363_x_at	ACTG1
212345_s_at	CREB3L2
212418_at	ELF1						***
212380_at	KIAA0082			***	***
212804_s_at	DKFZP434C212
212608_s_at	---
201410_at	PLEKHB2
212834_at	DDX52						***
212833_at	LOC91137						***
201419_at	BAP1
201421_s_at	MEP50						***
212845_at	SAMD4				***
212814_at	KIAA0828
201406_at	RPL36A
201428_at	CLDN4						***
212795_at	KIAA1033
201429_s_at	RPL37A
201435_s_at	EIF4E
212784_at	CIC		***	***	***	***
201437_s_at	EIF4E
212820_at	RC3			***	***	***	***
212870_at	C14orf138
201392_s_at	IGF2R
201393_s_at	IGF2R
212894_at	SUPV3L1			***	***	***	***
212893_at	DKFZP564I052
201395_at	RBM5						***
201397_at	PHGDH		***				***
212842_x_at	RANBP2L1
212875_s_at	C21orf25
212767_at	LOC92170
212869_x_at	TPT1						***
212861_at	MGC11308						***
201404_x_at	PSMB2		***				***
212858_at	PKMYT1						***
212857_x_at	PC4
212854_x_at	FLJ20719		***
212882_at	KIAA0795		***
212635_at	KPNB2						***
201466_s_at	JUN
212692_s_at	LRBA
212689_s_at	JMJD1		***	***	***	***
212665_at	TIPARP
212661_x_at	PPIAL3
201475_x_at	MARS						***
212781_at	RBBP6
201482_at	QSCN6			***	***	***
201464_x_at	JUN
212630_at	SEC6						***
201488_x_at	KHDRBS1
212628_at	PRKCL2
212623_at	KIAA0033
212622_at	KIAA0033
201492_s_at	RPL41
201480_s_at	SUPT5H
212721_at	SFRS12
209609_s_at	MRPL9
212760_at	C6orf133						***
201450_s_at	TIA1
212754_s_at	KIAA1040
201454_s_at	NPEPPS		***				***
212752_at	CLASP1
212697_at	LOC162427		***	***	***
201460_at	MAPKAPK2		***
212698_s_at	SEPT10
212717_at	KIAA0356
212712_at	CAMSAP1
212711_at	CAMSAP1
212710_at	CAMSAP1
212709_at	NUP160
212704_at	KIAA0191
212780_at	SOS1
212751_at	UBE2N
205633_s_at	ALAS1			***	***
206015_s_at	KIAA1041
205677_s_at	DLEU1
205676_at	CYP27B1						***
205664_at	KIN
203350_at	AP1G1
203351_s_at	ORC4L		***
203348_s_at	ETV5		***		***	***
205634_x_at	LENG4
203346_s_at	M96
205627_at	CDA						***
205601_s_at	HOXB5
205600_x_at	HOXB5
205594_at	KIAA0924
203363_s_at	KIAA0652
205550_s_at	BRE
203356_at	CAPN7						***
203327_at	IDE
205189_s_at	FANCC			***	***	***	***
205963_s_at	DNAJA3		***				***
205961_s_at	PSIP2						***
203306_s_at	C6orf165
203314_at	PGPL						***
205879_x_at	RET						***
205687_at	UBPH
205832_at	CPA4						***
203371_s_at	NDUFB3		***				***
203328_x_at	IDE
205774_at	F12						***
203333_at	KIFAP3						***
203338_at	PPP2R5E		***
203344_s_at	RBBP8
205745_x_at	ADAM17
205847_at	PRSS22
205246_at	PEX13					***
205324_s_at	FTSJ1						***
205323_s_at	MTF1
203414_at	MMD		***				***
203416_at	CD53
203418_at	CCNA2		***
205284_at	KIAA0133		***
205546_s_at	TYK2						***
205251_at	PER2		***	***	***	***
205351_at	GGCX					***
205235_s_at	MPHOSPH1		***
203447_at	PSMD5						***
205205_at	RELB		***				***
205196_s_at	AP1S1						***
205195_at	AP1S1						***
202348_s_at	DYT1						***
203433_at	MTHFS
203394_s_at	HES1		***
206016_at	JM1						***
205482_x_at	SNX15		***
203376_at	CDC40
203379_at	RPS6KA1		***				***
203385_at	DGKA						***
203387_s_at	TBC1D4
205327_s_at	ACVR2
203391_at	FKBP2			***	***	***
205340_at	ZNF450
203395_s_at	HES1		***
205412_at	ACAT1		***
205408_at	MLLT10
205401_at	AGPS
203406_at	MFAP1		***	***	***	***	***
203410_at	AP3M2		***
205545_x_at	DNAJC8						***
205455_at	MST1R				***		***
206853_s_at	MAP3K7
203303_at	TCTE1L						***
206989_s_at	SFRS2IP
206968_s_at	NFRKB
206936_x_at	NDUFC2						***
206911_at	ZNF147
206875_s_at	SLK						***
207011_s_at	PTK7
206854_s_at	MAP3K7
203174_s_at	ARFRP1			***	***	***
203181_x_at	SRPK2		***
206809_s_at	---
206792_x_at	PDE4C						***
203188_at	B3GNT6
203192_at	ABCB6		***
203193_at	ESRRA
206858_s_at	HOXC6
207186_s_at	FALZ			***	***	***	***
203127_s_at	SPTLC2		***
207391_s_at	PIP5K1A		***
207338_s_at	ZNF200		***
207291_at	TMG4
207268_x_at	ABI-2
207266_x_at	RBMS1
206992_s_at	ATP5S		***
207187_at	JAK3						***
203208_s_at	CHPPR		***
203157_s_at	GLS		***
203159_at	GLS		***
203162_s_at	KATNB1		***
203164_at	SLC33A1		***				***
203166_at	CFDP1
203168_at	CREBL1
207239_s_at	PCTK1		***	***	***	***
203273_s_at	PDAP2		***	***	***		***
206186_at	MPP3
206184_at	CRKL		***
206158_s_at	ZNF9		***
206139_at	PIK4CB
203265_s_at	MAP2K4
206132_at	MCC		***
206723_s_at	EDG4						***
206109_at	FUT1
206245_s_at	IVNS1ABP
206095_s_at	FUSIP1
206075_s_at	CSNK2A1
206050_s_at	RNH
206037_at	CCBL1
203289_s_at	C16orf35			***	***	***	***
203291_at	CNOT4
203268_s_at	DRG2						***
203235_at	THOP1						***
205176_s_at	ITGB3BP
206571_s_at	MAP4K4
206559_x_at	---
206555_s_at	FLJ20274						***
203217_s_at	SIAT9		***
203228_at	PAFAH1B3						***
203257_s_at	MGC4707						***
203234_at	UPP1						***
206238_s_at	YAF2						***
203244_at	PXR1
206352_s_at	PEX10
203250_at	RBM16
203254_s_at	TLN1
206263_at	FMO4			***	***	***
206257_at	DKFZP586M1019						***
203207_s_at	CHPPR		***
203230_at	DVL1
203800_s_at	MRPS14
203712_at	XTP5
204294_at	AMT		***
204290_s_at	ALDH6A1		***
203790_s_at	UK114
204283_at	FARS1
204282_s_at	FARS1
204313_s_at	CREB1				***
204267_x_at	PKMYT1						***
203774_at	MTR		***	***	***	***	***
203802_x_at	WBSCR20A						***
204247_s_at	CDK5			***	***	***
204243_at	RLF						***
204234_s_at	ZNF195		***
203819_s_at	IMP-3		***
203820_s_at	IMP-3		***
204269_at	PIM2		***		***
204354_at	POT1
203458_at	SPR
204426_at	RNP24					***	***
203727_at	SKIV2L
203732_at	TRIP4						***
204387_x_at	MRP63						***
204383_at	DGCR14		***				***
203781_at	MRPL33						***
204373_s_at	CAP350		***
204209_at	---
203748_x_at	RBMS1
204350_s_at	CRSP9		***
204341_at	TRIM16						***
204332_s_at	AGA
203765_at	GCA		***
204321_at	NEO1
203738_at	FLJ11193		***	***
204031_s_at	DKFZP564J157
203926_x_at	ATP5D		***				***
203932_at	HLA-DMB
203933_at	Rab11-FIP3
203935_at	ACVR1		***
203941_at	FLJ10871
204041_at	MAOB						***
204212_at	PTE1		***
204032_at	BCAR3
204120_s_at	ADK
204027_s_at	METTL1			***	***	***
204022_at	WWP2
203947_at	CSTF3						***
203959_s_at	KIAA0478					***	***
204000_at	GNB5
203978_at	NUBP1		***	***	***	***	***
203944_x_at	BTN2A1		***
203857_s_at	PDIR						***
203711_s_at	HIBCH
204207_s_at	RNGTT
203829_at	ELP4		***		***		***
204186_s_at	PPID		***	***	***	***	***
204181_s_at	ZNF297B						***
204177_s_at	AB026190
203925_at	GCLM						***
203831_at	KIAA1002
203911_at	RAP1GA1
204165_at	WASF1						***
204160_s_at	ENPP4		***
203875_at	SMARCA1
203893_at	TAF9
204131_s_at	---
204125_at	CIA30				***		***
204211_x_at	PRKR			***	***	***
204173_at	MLC1SA		***
203575_at	CSNK2A2
203719_at	ERCC1
203536_s_at	CIAO1
203538_at	CAMLG
203552_at	MAP4K5
204968_at	APOM
203566_s_at	AGL
203530_s_at	STX4A
203572_s_at	TAF6
205010_at	FLJ10613
204893_s_at	MADHIP			***	***	***
204892_x_at	EEF1A1
204868_at	ICT1				***
204856_at	B3GNT3						***
204853_at	ORC2L		***				***
204847_at	ZNF-U69274		***
204927_at	C11orf13
205094_at	PEX12						***
205173_x_at	CD58
203467_at	PMM1		***				***
203476_at	TPBG					***
205142_x_at	ABCD1
203480_s_at	HSHIN1
205134_s_at	NUFIP1				***	***
203531_at	CUL5
203500_at	GCDH		***				***
203599_s_at	WBP4
205074_at	SLC22A5
205047_s_at	ASNS						***
205020_s_at	ARL4
205018_s_at	MBNL2		***				***
205016_at	TGFA
205012_s_at	HAGH						***
205133_s_at	HSPE1
204528_s_at	NAP1L1						***
204649_at	TROAP		***		***	***
204640_s_at	SPOP						***
204618_s_at	GABPB2		***		***	***	***
204615_x_at	IDI1		***		***	***
204608_at	ASL		***	***		***	***
203654_s_at	COIL
204837_at	MTMR9
203672_x_at	TPMT			***	***	***
204658_at	TRA2A						***
204524_at	PDPK1		***
204510_at	CDC7						***
204500_s_at	AGTPBP1			***	***	***
204495_s_at	DKFZP434H132
203704_s_at	RREB1
204485_s_at	TOM1L1		***
203658_at	SLC25A20						***
203625_x_at	SKP2
207483_s_at	TIP120A		***
204826_at	CCNF		***	***	***	***
204778_x_at	HOXB7		***
204771_s_at	TTF1
204769_s_at	TAP2
204744_s_at	IARS
204656_at	SHB						***
204717_s_at	SLC29A2
204657_s_at	SHB						***
203633_at	CPT1A
204700_x_at	MGC29875
204699_s_at	MGC29875
204691_x_at	PLA2G6		***		***	***	***
204676_at	DKFZP564K2062		***		***
203640_at	MBNL2		***				***
204832_s_at	BMPR1A
203622_s_at	LOC56902			***	***	***	***
202629_at	APPBP2						***
202551_s_at	CRIM1		***		***	***
209088_s_at	UBN1		***
209078_s_at	TXN2		***				***
202615_at	---
209068_at	HNRPDL		***		***	***
209058_at	EDF1		***		***		***
202604_x_at	ADAM10
209056_s_at	CDC5L						***
209100_at	IFRD2
202634_at	POLR2K		***
209042_s_at	UBE2G2
209039_x_at	EHD1
209028_s_at	SSH3BP1						***
209025_s_at	SYNCRIP
209024_s_at	SYNCRIP
209057_x_at	CDC5L						***
202578_s_at	FLJ11126		***				***
203120_at	TP53BP2
209155_s_at	NT5C2
202559_x_at	DKFZP547E1010
209148_at	RXRB
202565_s_at	SVIL
209136_s_at	USP10						***
209095_at	DLD
209134_s_at	RPS6
209014_at	MAGED1
202584_at	NFX1				***
209120_at	NR2F2		***
202590_s_at	PDK2		***	***	***	***
202595_s_at	LEPROTL1
202596_at	ENSA						***
202598_at	S100A13
202571_s_at	DAP4
208886_at	H1F0
208913_at	GGA2
208912_s_at	CNP
208911_s_at	PDHB		***				***
208907_s_at	MRPS18B
208905_at	CYCS		***			***	***
208901_s_at	TOP1
209018_s_at	PINK1
208895_s_at	DDX18
202716_at	PTPN1
202739_s_at	PHKB
208881_x_at	IDI1		***		***	***
202745_at	USP8		***				***
208874_x_at	PPP2R4
202749_at	WRB						***
208872_s_at	DP1
208900_s_at	TOP1
208990_s_at	HNRPH3
202544_at	GMFB						***
209009_at	ESD						***
209007_s_at	DJ465N24.2.1			***	***	***
202654_x_at	AXOT
202655_at	ARMET			***	***	***
209001_s_at	DKFZP566D193						***
208921_s_at	SRI
208994_s_at	PPIG						***
202717_s_at	CDC16			***	***	***	***
202679_at	NPC1			***	***	***
202689_at	HUMAGCGB		***		***
202712_s_at	CKMT1
208940_at	SEPHS1		***	***	***	***
208939_at	SEPHS1		***	***	***	***
202713_s_at	KIAA0391			***	***	***
202651_at	KIAA0205
202667_s_at	SLC39A7
202412_s_at	USP1		***
209157_at	DNAJA2						***
209471_s_at	FNTA			***	***	***	***
202387_at	BAG1
202388_at	RGS2		***
202392_s_at	PISD		***				***
202402_s_at	CARS						***
209476_at	TXNDC			***	***	***	***
202409_at	---
202384_s_at	TCOF1		***	***
209433_s_at	PPAT			***	***
209430_at	BTAF1			***	***	***	***
209429_x_at	EIF2B4
209428_s_at	ZFPL1		***			***
202415_s_at	HSPBP1
209418_s_at	C22orf19						***
209452_s_at	VTI1B			***	***	***
209511_at	POLR2F
211474_s_at	---
202362_at	RAP1A
209538_at	ZNF32
209536_s_at	EHD4		***				***
202369_s_at	TRAM2
209518_at	SMARCD1
209472_at	LOC56267		***
209514_s_at	RAB27A
202431_s_at	MYC						***
202372_at	FLJ10326		***
202379_s_at	NKTR
209494_s_at	ZNF278
202380_s_at	NKTR
209486_at	SAS10						***
209481_at	SNRK					***	***
202370_s_at	CBFB
209184_s_at	IRS2		***	***	***	***
202494_at	PPIE						***
209259_s_at	CSPG6		***	***	***	***	***
209239_at	NFKB1
202502_at	ACADM						***
209224_s_at	NDUFA2		***
209193_at	PIM1			***	***
209416_s_at	FZR1
202531_at	IRF1		***
209303_at	NDUFS4						***
202533_s_at	DHFR						***
202537_s_at	DKFZP564O123
202538_s_at	DKFZP564O123
202539_s_at	HMGCR		***
209174_s_at	FLJ20259
202541_at	SCYE1						***
209192_x_at	HTATIP
209326_at	SLC35A2		***				***
208854_s_at	STK24
209385_s_at	PROSC
209382_at	RPC62
209379_s_at	KIAA1128						***
209364_at	BAD		***
209345_s_at	PI4KII		***
209273_s_at	MGC4276					***
202462_s_at	DDX46			***	***	***	***
209300_s_at	DKFZP566B183				***	***
209321_s_at	ADCY3
202466_at	POLS			***	***
209317_at	POLR1C
202467_s_at	TRIP15						***
209308_s_at	BNIP2		***				***
202474_s_at	HCFC1			***	***	***
209404_s_at	CGI-109
209337_at	PSIP2						***
208238_x_at	---
208865_at	CSNK1A1
208393_s_at	RAD50						***
208384_s_at	MID2		***
208374_s_at	CAPZA1
208351_s_at	MAPK1		***
208336_s_at	GPSN2		***				***
202960_s_at	MUT				***	***
208248_x_at	APLP2		***
208424_s_at	LOC57019						***
208118_x_at	LAT1-3TM
208112_x_at	EHD1
208103_s_at	ANP32E		***			***	***
208101_s_at	MGC2668
208097_s_at	TXNDC			***	***	***	***
203012_x_at	RPL23A
208319_s_at	RBM3		***				***
202937_x_at	CGI-96						***
208625_s_at	EIF4G1
202916_s_at	FAM20B		***
202926_at	NAG		***
208619_at	DDB1
208612_at	GRP58		***				***
202930_s_at	SUCLA2			***	***	***	***
208398_s_at	TBPL1
202934_at	HK2
208070_s_at	REV3L
202938_x_at	CGI-96						***
202942_at	ETFB		***
202943_s_at	NAGA
208456_s_at	RRAS2						***
208452_x_at	MYO9B
202956_at	BIG1
202933_s_at	YES1
203097_s_at	PDZGEF1
207707_s_at	SEC13L1						***
203073_at	COG2		***				***
207627_s_at	TFCP2		***				***
207618_s_at	BCS1L						***
203089_s_at	PRSS25		***
203093_s_at	TIMM44		***
208082_x_at	MKRN4		***				***
207573_x_at	ATP5L				***	***	***
203067_at	PDHX			***	***	***
207556_s_at	DGKZ		***
207543_s_at	P4HA1				***
207535_s_at	NFKB2		***
207499_x_at	SMAP-1
203114_at	MTVR1
209622_at	STK16
207598_x_at	XRCC2
207801_s_at	RNF10						***
208635_x_at	NACA
208024_s_at	DGCR6
208021_s_at	RFC1			***	***	***	***
218149_s_at	DKFZp434K1210
207842_s_at	MLN51						***
207830_s_at	PPP1R8						***
207713_s_at	C20orf18
203043_at	ALTE
207714_s_at	SERPINH1
203044_at	CHSY1
207782_s_at	PSEN1						***
203047_at	STK10		***				***
207738_s_at	NCKAP1
207730_x_at	FLJ20700
203053_at	BCAS2			***	***	***	***
203016_s_at	SSX2IP		***				***
207812_s_at	GORASP2			***	***
202816_s_at	SS18
208803_s_at	SRP72
208800_at	SRP72
202788_at	MAPKAPK3		***
208793_x_at	SMARCA4			***	***	***	***
208786_s_at	MAP1LC3B			***	***		***
208784_s_at	KLHDC3
208746_x_at	ATP5L				***	***	***
202810_at	DRG1
208813_at	GOT1		***			***
202819_s_at	TCEB3
208768_x_at	RPL22
202820_at	AHR		***
208757_at	HSGP25L2G
208756_at	EIF3S2					***
208626_s_at	VAT1						***
208780_x_at	VAPA						***
208834_x_at	RPL23A
203119_at	MGC2574				***	***
208853_s_at	CANX				***
208852_s_at	CANX				***
202767_at	ACP2
208842_s_at	GORASP2			***	***
202769_at	CCNG2		***
202785_at	NDUFA7
208838_at	TIP120A		***
202782_s_at	SKIP						***
208832_at	E46L
208830_s_at	SUPT6H				***
202776_at	HSU15552						***
208825_x_at	RPL23A
208823_s_at	PCTK1		***	***	***	***
208819_at	MEL			***	***	***	***
208737_at	ATP6V1G1						***
202772_at	HMGCL						***
208645_s_at	---
208678_at	ATP6V1E1						***
202876_s_at	PBX2
208673_s_at	SFRS3		***		***
208666_s_at	ST13
208664_s_at	TTC3
208658_at	ERP70		***	***	***	***
202842_s_at	DNAJB9		***
208648_at	VCP
202872_at	ATP6V1C1						***
202900_s_at	NUP88		***	***	***	***
208641_s_at	RAC1
208640_at	RAC1
208639_x_at	P5
202905_x_at	NBS1
202761_s_at	SYNE2
208653_s_at	CD164				***
208703_s_at	APLP2		***
202847_at	PCK2		***	***	***
208735_s_at	CTDSP2		***				***
202848_s_at	GPRK6
202852_s_at	FLJ11506
208720_s_at	RNPC2
208715_at	LOC54499			***	***		***
208680_at	PRDX1						***
208704_x_at	APLP2		***
208683_at	CAPN2
202864_s_at	SP100		***
208696_at	CCT5			***	***
208695_s_at	RPL39
208692_at	RPS3						***
208690_s_at	PDLIM1
202871_at	TRAF4				***
202909_at	EPM2AIP1
208705_s_at	EIF5		***
200082_s_at	RPS7						***
200074_s_at	RPL14						***
217971_at	MAP2K1IP1						***
217619_x_at	---
214055_x_at	XTP2						***
217972_at	FLJ20420		***		***
201025_at	IF2
216267_s_at	PL6
217516_x_at	ARVCF		***
214992_s_at	DNASE2						***
214042_s_at	---
217970_s_at	KIAA1194		***
214036_at	---
217968_at	TSSC1		***
214989_x_at	PEPP2			***	***	***
215716_s_at	ATP2B1		***
200081_s_at	RPS6
217496_s_at	IDE
200080_s_at	H3F3A
201021_s_at	DSTN		***
201020_at	YWHAH
216282_x_at	POLR2C
217981_s_at	FXC1
200050_at	ZNF146
200816_s_at	PAFAH1B1					***	***
217718_s_at	YWHAB		***
200092_s_at	---
200091_s_at	RPS25						***
200089_s_at	RPL4
217736_s_at	HRI						***
200697_at	HK1
217733_s_at	TMSB10
200703_at	DNCL1		***
214549_x_at	SPRR1A						***
217954_s_at	PHF3
214550_s_at	TNPO3						***
214070_s_at	ATP10B
200825_s_at	HYOU1		***				***
214007_s_at	PTK9
200823_x_at	RPL29						***
217716_s_at	SEC61A1
215747_s_at	CHC1
217703_x_at	---
200709_at	FKBP1A		***	***	***
215737_x_at	USF2
217964_at	FLJ20343						***
200710_at	ACADVL
217673_x_at	---
200820_at	PSMD8						***
216241_s_at	TCEA1
214953_s_at	APP				***		***
214620_x_at	PAM						***
217256_x_at	---
200061_s_at	RPS24						***
218011_at	UBL5
218013_x_at	DCTN4
217249_x_at	---
200735_x_at	NACA
213941_x_at	RPS7						***
217226_s_at	PRRX1						***
216342_x_at	---
215222_x_at	MACF1
200059_s_at	ARHA		***
213971_s_at	---
200889_s_at	SSR1						***
200890_s_at	SSR1						***
200053_at	SPAG7
215227_x_at	ACP1			***	***	***
216348_at	---
217207_s_at	BTNL3
213923_at	RAP2B		***		***
213918_s_at	IDN3			***	***	***
200891_s_at	SSR1						***
200051_at	SART1
213937_s_at	FTSJ1						***
215707_s_at	PRNP
217427_s_at	HIRA
217398_x_at	GAPD						***
217985_s_at	BAZ1A
214005_at	GGCX					***
217986_s_at	BAZ1A
217988_at	C14orf18		***
215179_x_at	PGF
214004_s_at	KIAA0121
217990_at	GMPR2						***
217393_x_at	---
201103_x_at	---
201016_at	EIF1A
217741_s_at	ZNF216
217370_x_at	FUS
200068_s_at	CANX				***
213986_s_at	C19orf6						***
214656_x_at	MYO1C
215207_x_at	---
217840_at	DDX41
201011_at	RPN1						***
217828_at	FLJ13213		***
217269_s_at	---
217266_at	---
200887_s_at	STAT1		***
217795_s_at	MGC3222
217739_s_at	PBEF
217802_s_at	NUCKS						***
217864_s_at	PIAS1						***
217869_at	HSD17B12		***				***
214352_s_at	KRAS2			***	***	***
214355_x_at	---
214239_x_at	---
214363_s_at	MATR3
214373_at	---
215128_at	---
217810_x_at	LARS						***
200845_s_at	PRDX6
200651_at	GNB2L1
200672_x_at	SPTBN1						***
217788_s_at	GALNT2		***
215148_s_at	APBA3		***
214205_x_at	TXNL2
214426_x_at	CHAF1A		***	***	***	***	***
214427_at	NOL1						***
200676_s_at	UBE2L3
200840_at	KARS
217886_at	EPS15						***
217888_s_at	ARFGAP1
217799_x_at	UBE2H			***	***
214268_s_at	MTMR4		***
217836_s_at	YAP						***
214305_s_at	SF3B1					***
200641_s_at	YWHAZ
200851_s_at	KIAA0174		***				***
215111_s_at	TSC22
217833_at	SYNCRIP
216071_x_at	TNRC11		***
200633_at	UBB
217830_s_at	NSFL1C		***		***	***
200940_s_at	RERE		***
217861_s_at	PREB		***	***	***	***	***
214866_at	PLAUR						***
217891_at	FLJ13868						***
217826_s_at	UBE2J1
217850_at	NS					***
200632_s_at	NDRG1			***	***
216028_at	DKFZP564C152
201055_s_at	HNRPA0		***	***	***	***
217852_s_at	FLJ10702						***
214327_x_at	TPT1						***
216026_s_at	POLE						***
217816_s_at	PCNP
217814_at	GK001
200852_x_at	GNB2						***
217926_at	HSPC023						***
217922_at	MAN1A2
200689_x_at	EEF1G						***
214494_s_at	SPG7
201035_s_at	HADHSC		***				***
201081_s_at	PIP5K2B		***				***
201082_s_at	DCTN1
217754_at	DDX56						***
217753_s_at	RPS26
200690_at	HSPA9B
201086_x_at	SON		***	***	***	***
217780_at	PTD008						***
200693_at	YWHAQ		***		***	***
201036_s_at	HADHSC		***				***
200599_s_at	TRA1		***	***	***	***
214507_s_at	RRP4		***
214512_s_at	PC4
216215_s_at	RBM9
200598_s_at	TRA1		***	***	***	***
217746_s_at	PDCD6IP
217935_s_at	C20orf44						***
217745_s_at	MAK3P		***
200594_x_at	HNRPU
215210_s_at	DLST				***	***
217750_s_at	FLJ13855						***
215075_s_at	GRB2
217740_x_at	RPL7A						***
201067_at	PSMC2
214173_x_at	C19orf2
200945_s_at	KIAA0905		***
217775_s_at	RDH11
217899_at	FLJ20254						***
201070_x_at	SF3B1					***
217900_at	FLJ10326		***
200613_at	AP2M1
201071_x_at	SF3B1					***
200933_x_at	RPS4X
201040_at	GNAI2						***
200834_s_at	RPS21
200609_s_at	WDR1			***	***	***
215073_s_at	NR2F2		***
200602_at	APP				***		***
214483_s_at	ARFIP1
216187_x_at	---
200684_s_at	UBE2L3
201077_s_at	NHP2L1						***
200601_at	ACTN4				***		***
215040_at	FLJ11712					***	***
215038_s_at	HYPB
217779_s_at	PNRC2
201041_s_at	DUSP1			***	***
215549_x_at	---
200915_x_at	KTN1						***
218090_s_at	WDR11						***
215294_s_at	SMARCA1
218091_at	HRB
214766_s_at	ELYS			***	***	***	***
214771_x_at	M-RIP		***			***
218093_s_at	ANKRD10
200012_x_at	RPL21						***
200967_at	PPIB			***	***	***	***
200010_at	RPL11
215582_x_at	MCM3AP
215553_x_at	---
214760_at	ZNF337
200919_at	PHC2
215548_s_at	C14orf163						***
215541_s_at	DIAPH1		***				***
218099_at	HT008						***
200007_at	SRP14
216392_s_at	SEC23IP						***
215537_x_at	DDAH2
218101_s_at	NDUFC2						***
201126_s_at	MGAT1
213853_at	---
200968_s_at	PPIB			***	***	***	***
201124_at	ITGB5
213852_at	RBM8A		***
200899_s_at	MGEA5
218066_at	SLC12A7
200025_s_at	RPL27
201120_s_at	PGRMC1
213848_at	DUSP7
218069_at	XTP3TPA		***	***	***	***	***
200766_at	CTSD
200767_s_at	C9orf10
215293_s_at	FRAG1
200017_at	RPS27A
200021_at	CFL1		***
201129_at	SFRS7
215588_x_at	RIOK3
200770_s_at	LAMC1			***		***
218079_s_at	LZK1
215584_at	KIAA0322
218083_at	PTGES2
200049_at	MYST2
216863_s_at	---
200771_at	LAMC1			***		***
200774_at	C9orf10
200018_at	RPS13						***
200022_at	RPL18
218140_x_at	APMCF1
215499_at	MAP2K3		***
218133_s_at	NIF3L1
214875_x_at	APLP2		***
214869_x_at	DKFZP434C212
216570_x_at	---
213754_s_at	PAIP1			***	***	***
216554_s_at	ENO1						***
218135_at	PTX1
215493_x_at	BTN2A1		***
213750_at	DKFZP564M182
218126_at	FLJ10579						***
200914_x_at	KTN1						***
214843_s_at	USP33						***
215492_x_at	PTCRA						***
216532_x_at	---
215482_s_at	EIF2B4
216524_x_at	---
215464_s_at	TIP-1
216520_s_at	---
121_at	PAX8
200801_x_at	ACTB
215452_x_at	---
216505_x_at	---
218139_s_at	C14orf108
216450_x_at	TRA1		***	***	***	***
216417_x_at	---
214895_s_at	ADAM10
216730_at	---
213812_s_at	CAMKK2						***
200777_s_at	BZW1
214894_x_at	MACF1
200969_at	SERP1		***
213803_at	KPNB1		***	***	***	***
216449_x_at	TRA1		***	***	***	***
213801_x_at	LAMR1
214849_at	C6orf69						***
214800_x_at	BTF3
214753_at	CG005		***
214801_at	---
216678_at	WDR10		***		***
214812_s_at	C21orf106		***
200001_at	CAPNS1
218116_at	LOC51759		***
200781_s_at	RPS15A			***	***	***	***
216640_s_at	---
201140_s_at	RAB5C		***				***
213775_x_at	NP220
214838_at	---
216689_x_at	ARHGAP1		***
200032_s_at	RPL9
218047_at	OSBPL9						***
200997_at	RBM4		***				***
200035_at	DULLARD
200998_s_at	CKAP4			***	***	***
200996_at	ACTR3
217117_x_at	MUC3B
214737_x_at	HNRPC		***	***	***		***
213875_x_at	C6orf62						***
215628_x_at	---
217106_x_at	HSA9761						***
218048_at	C10orf8						***
214707_x_at	ALMS1
217100_s_at	KIAA0794		***
200963_x_at	RPL31			***	***	***
214709_s_at	KTN1						***
200924_s_at	SLC3A2
213867_x_at	---
200961_at	SEPHS2						***
200895_s_at	FKBP4
200759_x_at	NFE2L1		***
217168_s_at	HERPUD1						***
216375_s_at	ETV5		***		***	***
200807_s_at	HSPD1
217185_s_at	---
200748_s_at	FTH1		***
218036_x_at	CGI-07
216958_s_at	IVD						***
200927_s_at	RAB14
213889_at	PIGL						***
201118_at	PGD
213877_x_at	SRRM2
213860_x_at	CSNK1A1						***
200034_s_at	RPL6						***
200805_at	LMAN2		***				***
213861_s_at	DKFZP586D0919
213887_s_at	POLR2E		***
218053_at	FNBP3
221094_s_at	ELP3						***
221268_s_at	SGPP1
221265_s_at	DKFZP564O1664		***		***	***	***
221255_s_at	MGC2963		***
218379_at	RBM7
221229_s_at	FLJ20628		***				***
218697_at	AF3P21
220974_x_at	BA108L7.2		***
221216_s_at	SCMH1
221435_x_at	HT036		***
221082_s_at	NDRG3						***
221073_s_at	CARD4					***
221064_s_at	FLJ23360
221059_s_at	CHST6
221027_s_at	PLA2G12
221012_s_at	TRIM8
219911_s_at	SLCO4A1		***
218384_at	CARHSP1		***
221506_s_at	TNPO2		***
221593_s_at	RPL31			***	***	***
221587_s_at	FLJ20640		***
221568_s_at	LIN7C
221553_at	DKFZp564K142
221541_at	DKFZP434B044				***
221538_s_at	DKFZp564A176
221528_s_at	ELMO2			***	***	***	***
218373_at	FTS
221509_at	DENR
221425_s_at	MGC4276					***
218364_at	LRRFIP2
221503_s_at	KPNA3				***	***	***
221498_at	SNX27
221490_at	UBAP1		***
221479_s_at	BNIP3L						***
218371_s_at	PSPC1						***
220960_x_at	RPL22
221522_at	DKFZP434L0718		***		***
218451_at	CDCP1
218433_at	PANK3		***
218442_at	TTC4
220200_s_at	SET07						***
218446_s_at	FAM18B						***
220175_s_at	---
220173_at	C14orf45						***
221006_s_at	SNX27
220081_x_at	HSD17B7						***
218431_at	C14orf133
218455_at	NFS1
220052_s_at	TINF2		***				***
218458_at	GMCL
220011_at	MGC2603		***	***	***	***	***
219991_at	SLC2A9
219924_s_at	ZNF258
31837_at	BC002942				***
220140_s_at	SNX11		***				***
218418_s_at	KIAA1518
218393_s_at	SMU-1						***
218395_at	ACTR6					***
218396_at	FLJ20136
220933_s_at	FLJ13409
220864_s_at	GRIM19
220768_s_at	CSNK1G3						***
220725_x_at	DNAH3
218432_at	FBXO3					***
220647_s_at	E2IG2		***				***
220295_x_at	SDP35		***
220486_x_at	FLJ22679
220419_s_at	USP25
220417_s_at	THAP4		***
220371_s_at	SLC12A9						***
220355_s_at	PB1						***
220352_x_at	---
221607_x_at	ACTG1
220720_x_at	FLJ14346
221965_at	MPHOSPH9		***
222130_s_at	FTSJ2
222105_s_at	---
222104_x_at	GTF2H3						***
222064_s_at	MGC2744						***
222052_at	FLJ41131
222027_at	NUCKS						***
221597_s_at	HSPC171		***
218267_at	CINP
222182_s_at	CNOT2
221964_at	TULP3		***
221963_x_at	---
221938_x_at	TRAP95						***
221937_at	AP1GBP1						***
218269_at	RNASE3L						***
221918_at	PCTK2			***	***	***
221899_at	CG005		***
221987_s_at	FLJ10534
222229_x_at	---
222380_s_at	---
222369_at	FLJ13848		***				***
222280_at	---
222279_at	HLA-F
218240_at	KBRAS2
222250_s_at	DKFZP434B168		***	***	***	***
218247_s_at	LOC51320		***
222138_s_at	WDR13
218250_s_at	CNOT7
222143_s_at	FLJ22405		***				***
222221_x_at	EHD1
222216_s_at	MRPL17
222204_s_at	RRN3		***				***
222201_s_at	CASP8AP2						***
222200_s_at	FLJ10276
222192_s_at	FLJ21820						***
218276_s_at	SAV1
218248_at	FLJ22794
218324_s_at	SPATS2			***	***	***
221893_s_at	ADCK2		***		***
218310_at	RABGEF1		***
221746_at	UBL4
218314_s_at	FLJ10726
218316_at	TIMM9			***	***	***
221737_at	GNA12		***				***
218320_s_at	P17.3		***				***
221768_at	SFPQ		***				***
221699_s_at	DDX50		***	***	***	***
221773_at	ELK3
218328_at	COQ4			***	***	***
218331_s_at	FLJ20360		***
221638_s_at	STX16			***	***	***
221636_s_at	FLJ20605
221634_at	RPL23AP7
221613_s_at	AWP1						***
218488_at	EIF2B3						***
221708_s_at	SMAP-1
218292_s_at	PRKAG2			***	***	***
221604_s_at	PEX16		***
221881_s_at	CLIC4						***
221850_x_at	---
221843_s_at	KIAA1609
221839_s_at	UBAP2			***	***	***
221836_s_at	T1				***		***
221830_at	RAP2A
221763_at	TRIP8
218289_s_at	UBE1DC1
218275_at	SLC25A10		***
221803_s_at	NRBF-2
218295_s_at	NUP50
218298_s_at	C14orf159						***
218301_at	RNPEPL1
221777_at	FLJ14827		***
221775_x_at	---
221774_x_at	P38IP						***
218288_s_at	MDS025						***
218912_at	GCC1					***
218942_at	PIP5K2C		***				***
218941_at	FBXW2
218937_at	ZNF434		***
218931_at	RAB17						***
218921_at	SIGIRR
218919_at	FLJ14007						***
218887_at	MRPL2		***
218915_at	NF2		***	***	***		***
218961_s_at	PNKP						***
218636_s_at	MAN1B1		***
218641_at	RTN3						***
218903_s_at	MGC2731		***				***
218895_at	FLJ12455
218642_s_at	MGC2217		***		***
218889_at	AD24
218480_at	FLJ21839		***
218917_s_at	SMARCF1						***
219007_at	NUP43
219063_at	C1orf35
219058_x_at	LCN7
219052_at	HPS6
218608_at	HSA9947
219037_at	CGI-115						***
219036_at	BITE		***
219020_at	FLJ14249
218945_at	MGC2654
218614_at	FLJ10652		***				***
218955_at	BRF2						***
218618_s_at	FAD104			***	***	***	***
218998_at	FLJ20457
218969_at	Magmas						***
218968_s_at	ZFP64		***
218967_s_at	PTER
218962_s_at	FLJ13576						***
218886_at	PAK1IP1						***
219015_s_at	MDS031						***
218685_s_at	SMUG1
218781_at	SMC6L1			***	***	***
218758_s_at	D21S2056E						***
218750_at	MGC5306						***
218748_s_at	SEC10L1
218680_x_at	HYPK
218735_s_at	AF020591
218888_s_at	NETO2
218731_s_at	WARP
218654_s_at	MRPS33
218722_s_at	FLJ12436		***
218721_s_at	C1orf27						***
218719_s_at	FLJ13912		***	***	***	***
218713_at	NARG2					***
218696_at	EIF2AK3		***		***
218701_at	CGI-83		***				***
218699_at	RAB7L1
218681_s_at	SDF2L1		***
218846_at	CRSP3						***
218878_s_at	SIRT1
218645_at	ZNF277
218872_at	TSC						***
218868_at	ARP3BETA
218867_s_at	FLJ21415		***				***
218862_at	ASB13
218855_at	TPRA40
218794_s_at	FLJ20511
218847_at	IMP-2
218797_s_at	SIRT7
218837_s_at	LOC51619						***
218827_s_at	FLJ10352
218651_s_at	FLJ11196
218653_at	SLC25A15
218816_at	LRRC1
218801_at	UGCGL2						***
218604_at	MAN1		***
218852_at	C14orf10
219397_at	FLJ13448		***
219462_at	FLJ22353		***				***
218544_s_at	RCL1		***
218545_at	FLJ11088						***
219445_at	GLTSCR1						***
219444_at	FLJ11362			***	***	***
219439_at	C1GALT1						***
219065_s_at	CGI-27
219399_at	LIN7C
219538_at	WDR5B
219392_x_at	FLJ11029		***
219384_s_at	ADAT1
219378_at	FLJ22054						***
219361_s_at	FLJ12484		***				***
219356_s_at	HSPC177
219353_at	FLJ20147
218557_at	NIT2
219420_s_at	FLJ12439						***
218512_at	WDR12			***	***	***
219731_at	ENTPD1						***
219709_x_at	MGC2494				***
219706_at	C20orf29
219682_s_at	TBX3		***
219678_x_at	DCLRE1C						***
219664_s_at	DECR2			***	***	***	***
218503_at	KIAA1797
218539_at	FBXO34						***
219628_at	WIG1
218535_s_at	RIOK2		***
219613_s_at	SIRT6						***
219590_x_at	CGI-30
219581_at	MGC2776
219571_s_at	ZNF325						***
219559_at	C20orf59		***
218527_at	APTX
219332_at	FLJ23471
219639_x_at	LOC56965			***	***	***	***
218595_s_at	FLJ10359
219350_s_at	DIABLO						***
218581_at	ABHD4		***
219130_at	FLJ10287		***	***	***	***
218593_at	FLJ10377						***
219124_at	FLJ23263		***				***
219122_s_at	FLJ20546
219119_at	LSM8						***
219178_at	QTRTD1		***
218594_at	FLJ10359
219180_s_at	PEX26
219098_at	MYBBP1A						***
219089_s_at	MGC2508			***	***	***
219083_at	FLJ10539						***
219079_at	NCB5OR
219077_s_at	WWOX
218601_at	URG4						***
221230_s_at	RBP1L1		***
219111_s_at	DDX54
219226_at	CRK7
219068_x_at	FLJ10709
219330_at	MGC5338
218561_s_at	C6orf149						***
218563_at	NDUFA3						***
218566_s_at	CHORDC1
219267_at	GLTP		***
219255_x_at	IL17RB			***	***	***
219176_at	FLJ22555						***
218571_s_at	C14orf123						***
219336_s_at	CGI-18
219214_s_at	RBAK						***
219205_at	SRR
218577_at	FLJ20331
219200_at	MGC5297
219198_at	GTF3C4
219193_at	FLJ10233						***
219182_at	CHST5
219245_s_at	FLJ13491
36566_at	CTNS					***
46270_at	UBAP1		***
35254_at	FLN29		***				***
44111_at	VPS33B				***		***
218181_s_at	FLJ20373
48117_at	LOC112869
36711_at	MAFF		***
49485_at	PRDM4
49878_at	PEX16		***
59999_at	HIF1AN						***
34689_at	TREX1		***
36888_at	KIAA0841
33323_r_at	SFN						***
35148_at	TJP3						***
54970_at	DKFZp761I2123
55081_at	MIRAB13			***	***	***
55583_at	DOCK6
218168_s_at	CABC1						***
58900_at	LOC51619						***
59375_at	---
218177_at	GNAL
40829_at	WDTC1		***
37950_at	PREP
38069_at	CLCN7						***
38157_at	DOM3Z
218198_at	DDX32
38671_at	PLXND1
38918_at	SOX13						***
40189_at	SET		***
40420_at	STK10		***				***
46167_at	TTC4
40569_at	---
36830_at	MIPEP
41387_r_at	KIAA0346
41856_at	UNC5B						***
41858_at	FRAG1
34206_at	CENTD2
218199_s_at	NOL6		***				***
218200_s_at	NDUFB2
44120_at	ADCK2		***		***
44563_at	FLJ10385
51774_s_at	LOC51619						***
218189_s_at	NANS		***				***
AFFX-HUMISGF3A/M97935_3_at	---
71933_at	WNT6
AFFX-M27830_5_at	---
AFFX-HUMGAPDH/M33197_5_at	GAPD						***
32259_at	EZH1			***	***	***	***
218156_s_at	FLJ10534
91920_at	BCAN
65884_at	MAN1B1		***
AFFX-BioB-5_at	---
79005_at	SLC35E1		***
AFFX-HUMGAPDH/M33197_M_at	GAPD						***
218226_s_at	NDUFB4
AFFX-HSAC07/X00351_3_at	ACTB
AFFX-hum_alu_at	---
218225_at	SITPEC		***				***
AFFX-HUMGAPDH/M33197_3_at	GAPD						***
AFFX-HUMRGE/M10098_3_at	---
65521_at	---
AFFX-r2-Ec-bioB-5_at	---
62212_at	MGC955
632_at	GSK3A
218164_at	FLJ21347		***
64883_at	MGC26706						***
AFFX-M27830_M_at	---
32029_at	PDPK1		***
64440_at	IL17RC
35666_at	SEMA3F			***	***	***
64418_at	AP1GBP1						***
213012_at	NEDD4	0
214499_s_at	BTF	0					***
208896_at	DDX18	0
209520_s_at	NCBP1	0
200728_at	ACTR2	0		***	***	***
203493_s_at	KIAA0092	0	***	***	***	***
208633_s_at	MACF1	0
208634_s_at	MACF1	0
204258_at	CHD1	0
201048_x_at	RAB6A	0	***				***
204772_s_at	TTF1	0
214257_s_at	SEC22L1	0
217778_at	SLC39A1	0
212058_at	SR140	0
202373_s_at	RAB3-GAP150	0	***
200626_s_at	MATR3	0
200624_s_at	MATR3	0
207983_s_at	STAG2	0	***
214671_s_at	ABR	0					***
214720_x_at	SEPT10	0
201291_s_at	TOP2A	0	***
202633_at	TOPBP1	0		***	***	***
212714_at	LOC113251	0		***	***	***	***
211851_x_at	BRCA1	0
204240_s_at	SMC2L1	0
212060_at	SR140	0
212342_at	MGC21416	0					***
209055_s_at	CDC5L	0					***
213518_at	PRKCI	0
218127_at	NFYB	0
211504_x_at	ROCK2	0		***	***	***
206874_s_at	SLK	0					***
203048_s_at	KIAA0372	0
212061_at	SR140	0
209022_at	STAG2	0	***
200992_at	IPO7	0
205632_s_at	PIP5K1B	0		***	***	***
208866_at	CSNK1A1	0
201237_at	CAPZA2	0
213137_s_at	PTPN2	0
209862_s_at	KIAA0092	0	***	***	***	***
201027_s_at	IF2	0
203156_at	AKAP11	0	***
201112_s_at	CSE1L	0	***
209158_s_at	PSCD2	0	***
215596_s_at	ZNF294	0
201992_s_at	KIF5B	0	***
201656_at	ITGA6	0
210947_s_at	MSH3	0
203605_at	SRP54	0	***
212214_at	OPA1	0
205446_s_at	ATF2	0	***	***	***	***
204004_at	PAWR	0
212217_at	SLC3A1	0					***
213070_at	PIK3C2A	0
210676_x_at	RANBP2L1	0
202301_s_at	FLJ11021	0
204843_s_at	PRKAR2A	0
201711_x_at	RANBP2	0					***
210858_x_at	ATM	0	***
201986_at	TRAP240	0	***
209902_at	ATR	0		***	***
202696_at	OSR1	0	***				***
201241_at	DDX1	0
201196_s_at	AMD1	0
208897_s_at	DDX18	0
201197_at	AMD1	0
213929_at	---	0
201830_s_at	NET1	0	***				***
203341_at	CBF2	0
214698_at	ROD1	0
205219_s_at	GALK2	0					***
209566_at	INSIG2	0
217043_s_at	MFN1	0
201101_s_at	BTF	0					***
212809_at	FLJ14639	0	***	***	***	***	***
214544_s_at	SNAP23	0	***				***
207098_s_at	MFN1	0
218244_at	C9orf34	0
218793_s_at	SCML1	0	***
220199_s_at	FLJ12806	0			***	***
218499_at	MST4	0					***
221691_x_at	NPM1	0					***
221823_at	LOC90355	0	***				***
221428_s_at	IRA1	0
218733_at	FLJ10546	0
222122_s_at	THOC2	0
219787_s_at	ECT2	0	***				***
212307_s_at	OGT	1
203087_s_at	KIF2	1
209020_at	C20orf111	1
209023_s_at	STAG2	1	***
202451_at	GTF2H1	1					***
212086_x_at	LMNA	1
207563_s_at	OGT	1
208943_s_at	TLOC1	1					***
211992_at	PRKWNK1	1		***	***
217825_s_at	UBE2J1	1
207467_x_at	CAST	1
209485_s_at	OSBPL1A	1
214718_at	ODAG	1		***	***		***
209369_at	ANXA3	1					***
214696_at	MGC14376	1	***	***	***	***	***
202333_s_at	UBE2B	1
209012_at	TRIO	1
203105_s_at	DNM1L	1	***				***
207657_x_at	KPNB2	1					***
209122_at	ADFP	1
209249_s_at	GHITM	1
212197_x_at	M-RIP	1	***			***
201019_s_at	EIF1A	1
202874_s_at	ATP6V1C1	1					***
216996_s_at	KIAA0971	1					***
217738_at	PBEF	1
208864_s_at	TXN	1
200995_at	IPO7	1
217465_at	NCKAP1	1
201559_s_at	CLIC4	1					***
214629_x_at	RTN4	1		***	***	***	***
201574_at	ETF1	1	***
209225_x_at	KPNB2	1					***
209165_at	AATF	1		***	***	***
208772_at	FLJ20288	1	***	***	***	***
209822_s_at	VLDLR	1
212474_at	KIAA0241	1
212470_at	SPAG9	1	***		***	***	***
212467_at	RME8	1
212464_s_at	FN1	1	***		***		***
212219_at	PSME4	1
201595_s_at	LEREPO4	1
202358_s_at	SNX19	1	***
212222_at	PSME4	1
201560_at	CLIC4	1					***
210028_s_at	ORC3L	1	***
210105_s_at	FYN	1	***				***
208290_s_at	EIF5	1	***
208310_s_at	FSTL1	1
200976_s_at	TAX1BP1	1
200977_s_at	TAX1BP1	1
214431_at	GMPS	1
216442_x_at	FN1	1	***		***		***
214435_x_at	RALA	1
209272_at	NAB1	1		***	***	***
208908_s_at	CAST	1
209903_s_at	ATR	1		***	***
214437_s_at	SHMT2	1		***	***
202720_at	TES	1	***
208540_x_at	---	1
212612_at	RCOR	1	***
209653_at	KPNA4	1	***
209248_at	GHITM	1
201629_s_at	ACP1	1		***	***	***
208878_s_at	PAK2	1					***
200776_s_at	---	1
208875_s_at	PAK2	1					***
209744_x_at	ITCH	1	***				***
212267_at	KIAA0261	1
212010_s_at	H41	1	***
212379_at	GART	1	***
205854_at	TULP3	1	***
202124_s_at	ALS2CR3	1
210968_s_at	RTN4	1		***	***	***	***
203374_s_at	TPP2	1	***
202056_at	KPNA1	1					***
202129_s_at	RIOK3	1
202130_at	RIOK3	1
211343_s_at	COL13A1	1
214096_s_at	LOC56901	1
202131_s_at	RIOK3	1
217941_s_at	ERBB2IP	1			***	***
205704_s_at	ATP6V0A2	1	***				***
213531_s_at	RAB3GAP	1					***
205790_at	SCAP1	1
203200_s_at	MTRR	1	***				***
217898_at	LOC56851	1
201138_s_at	SSB	1
203253_s_at	KIAA0433	1
213793_s_at	HOMER1	1		***	***
204190_at	D13S106E	1
202147_s_at	IFRD1	1	***				***
201177_s_at	UBA2	1					***
204194_at	BACH1	1		***	***	***
202033_s_at	RB1CC1	1	***
202011_at	TJP1	1
210495_x_at	FN1	1	***		***		***
204216_s_at	FLJ11806	1		***	***	***
[truncated: 7,273 more rows]
